# Supplementary material for: Structure of papain-like protease from SARS-CoV-2 and its complexes with non-covalent inhibitors
Source: Springer Nature journal article supplement (doi:10.1038/s41467-021-21060-3), 2021-02-02

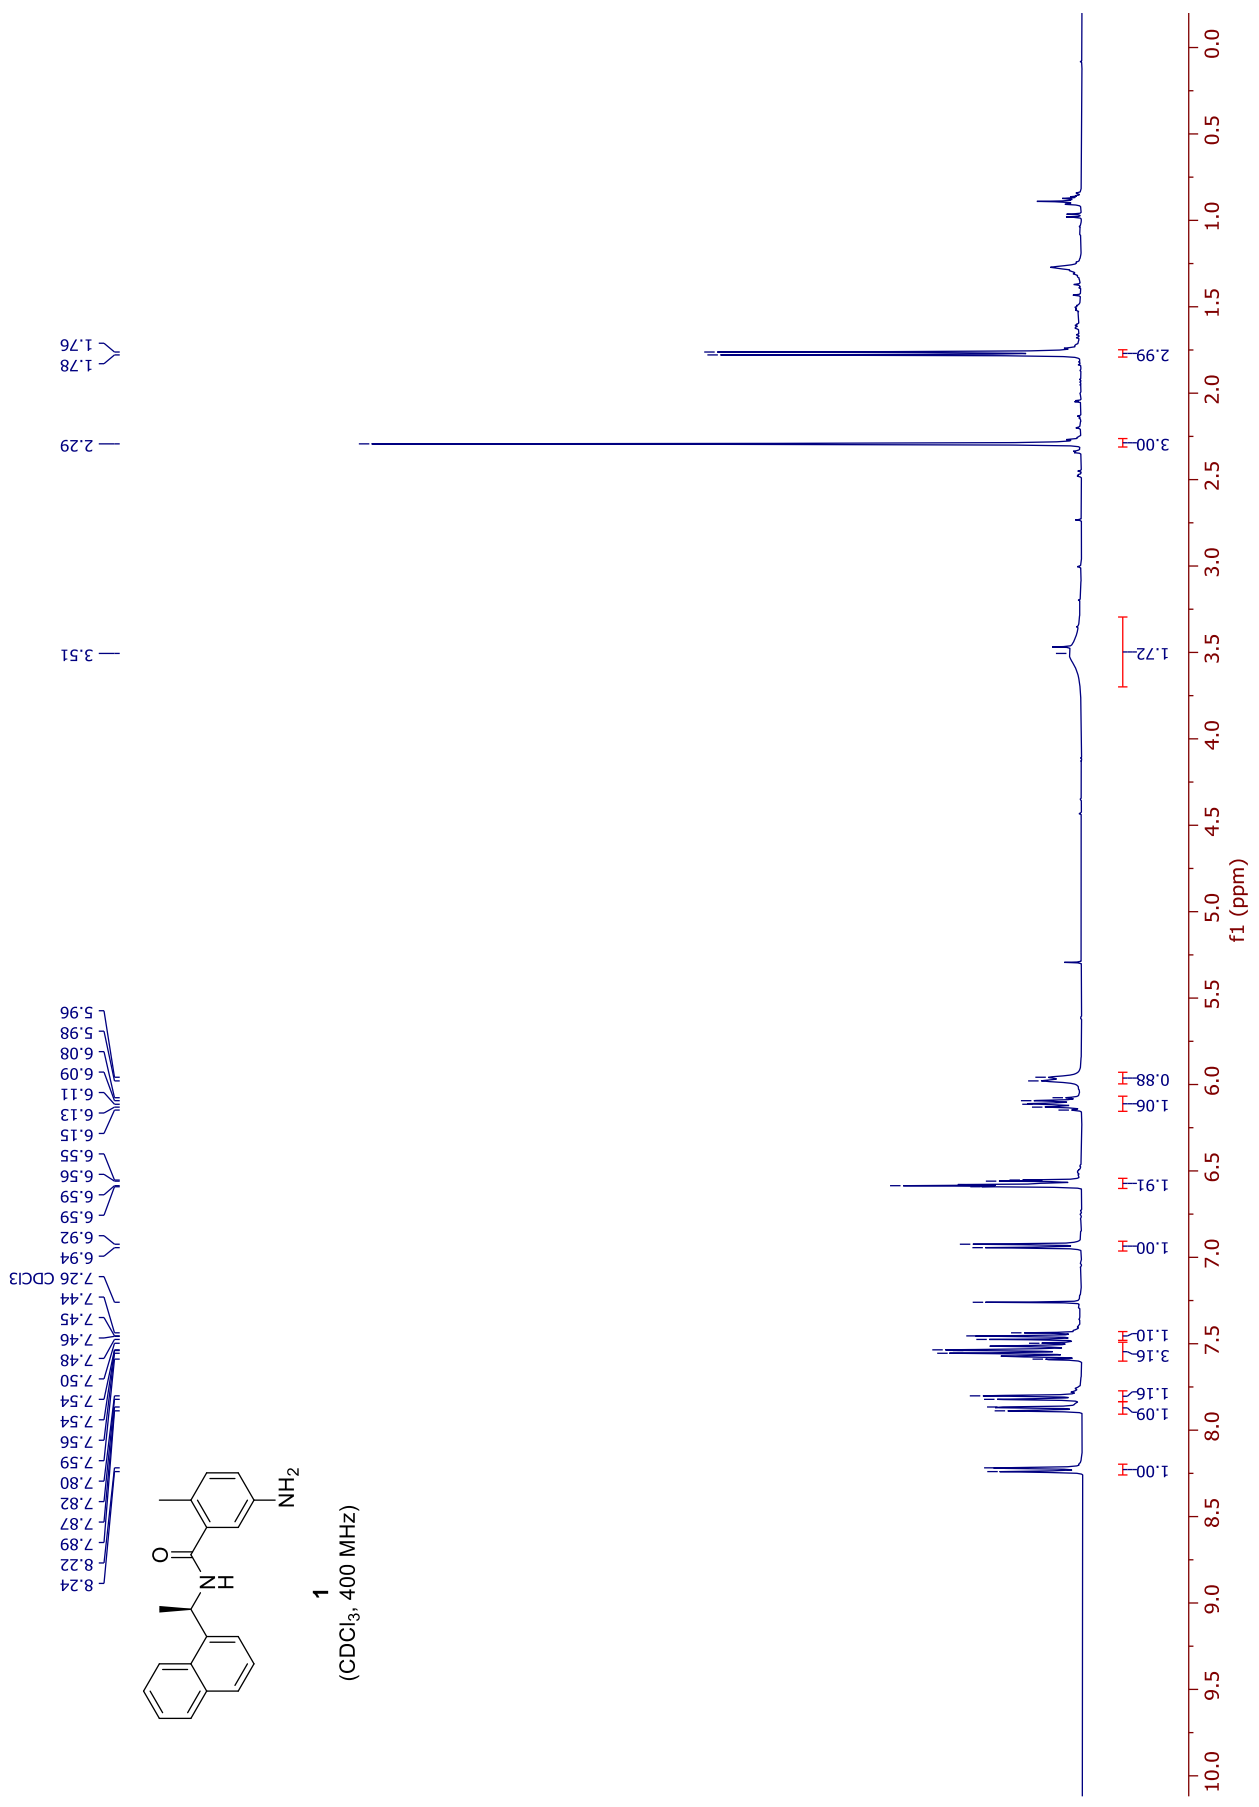

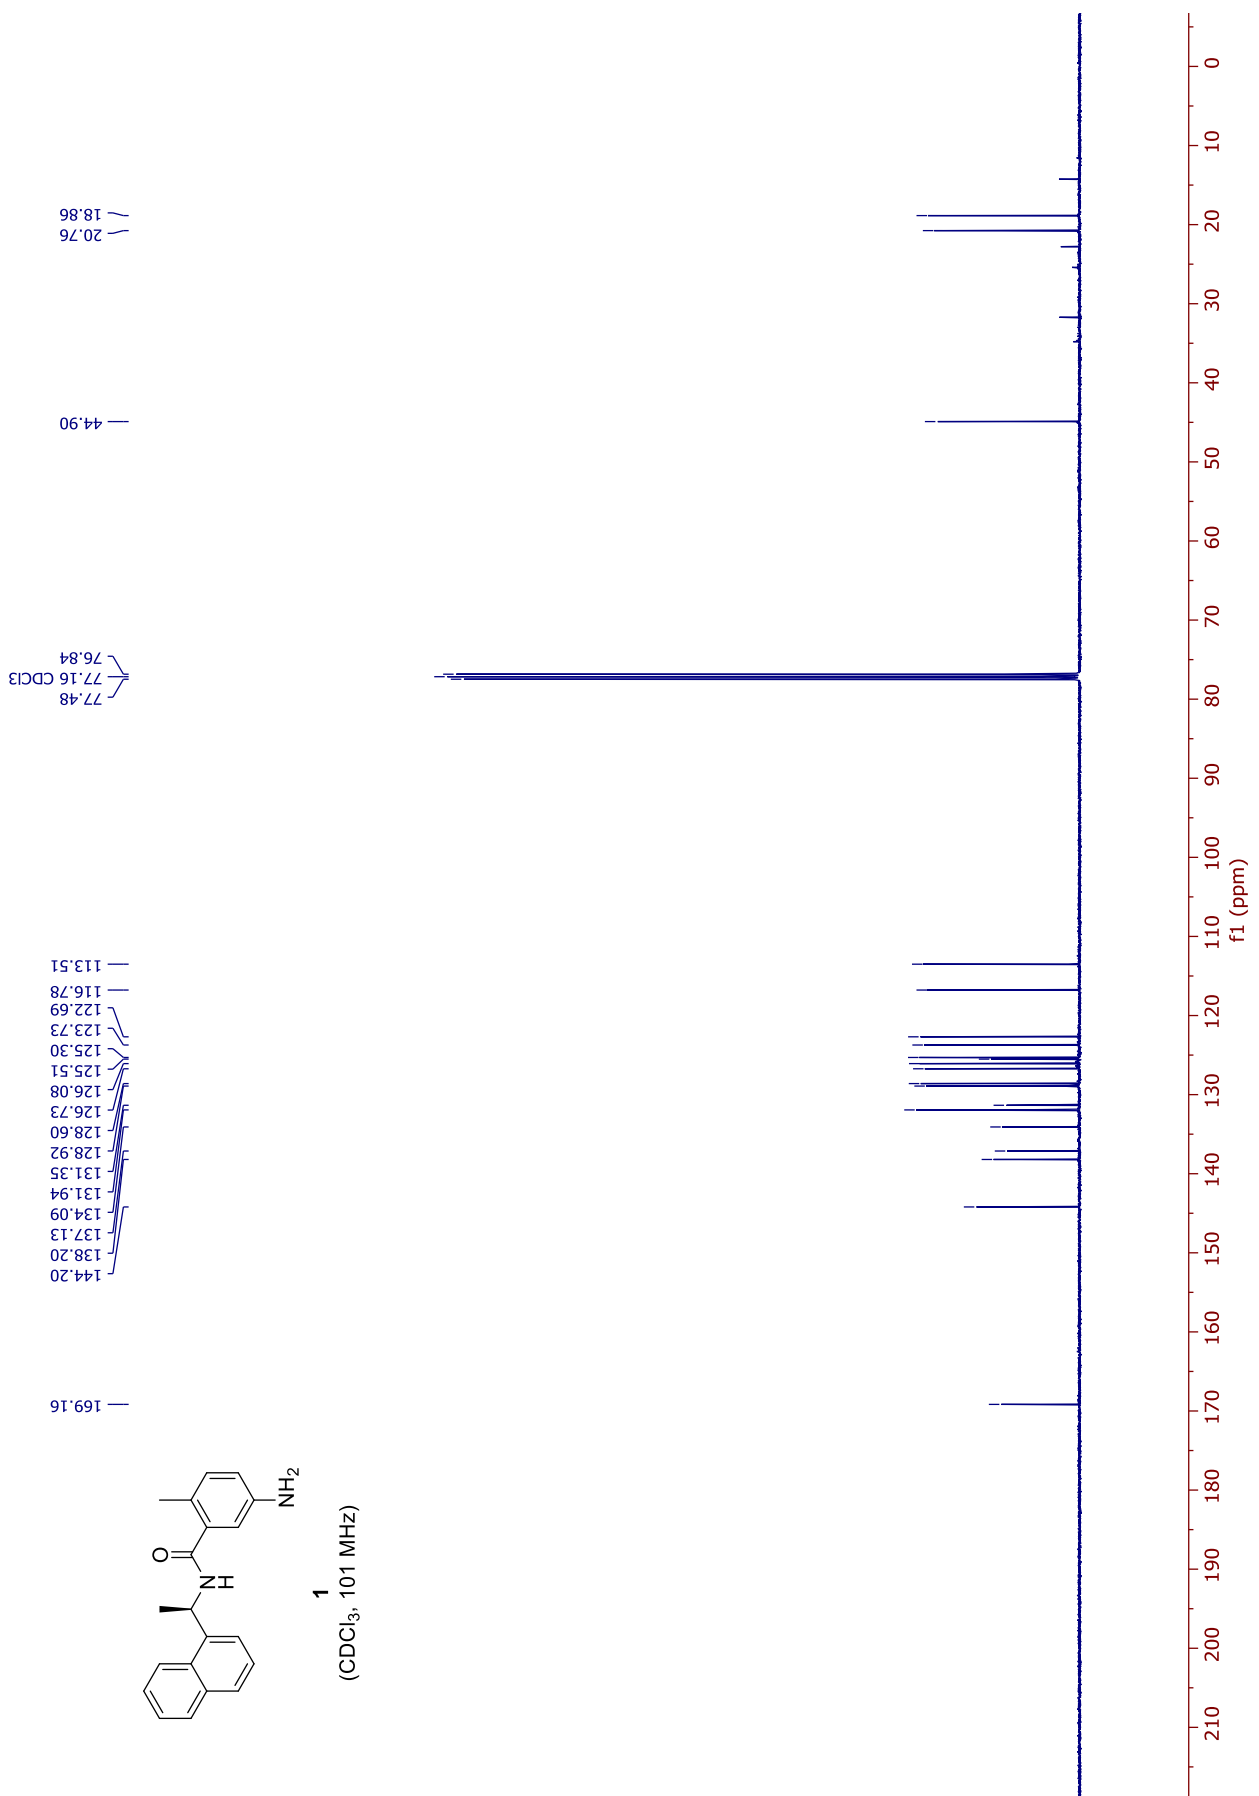

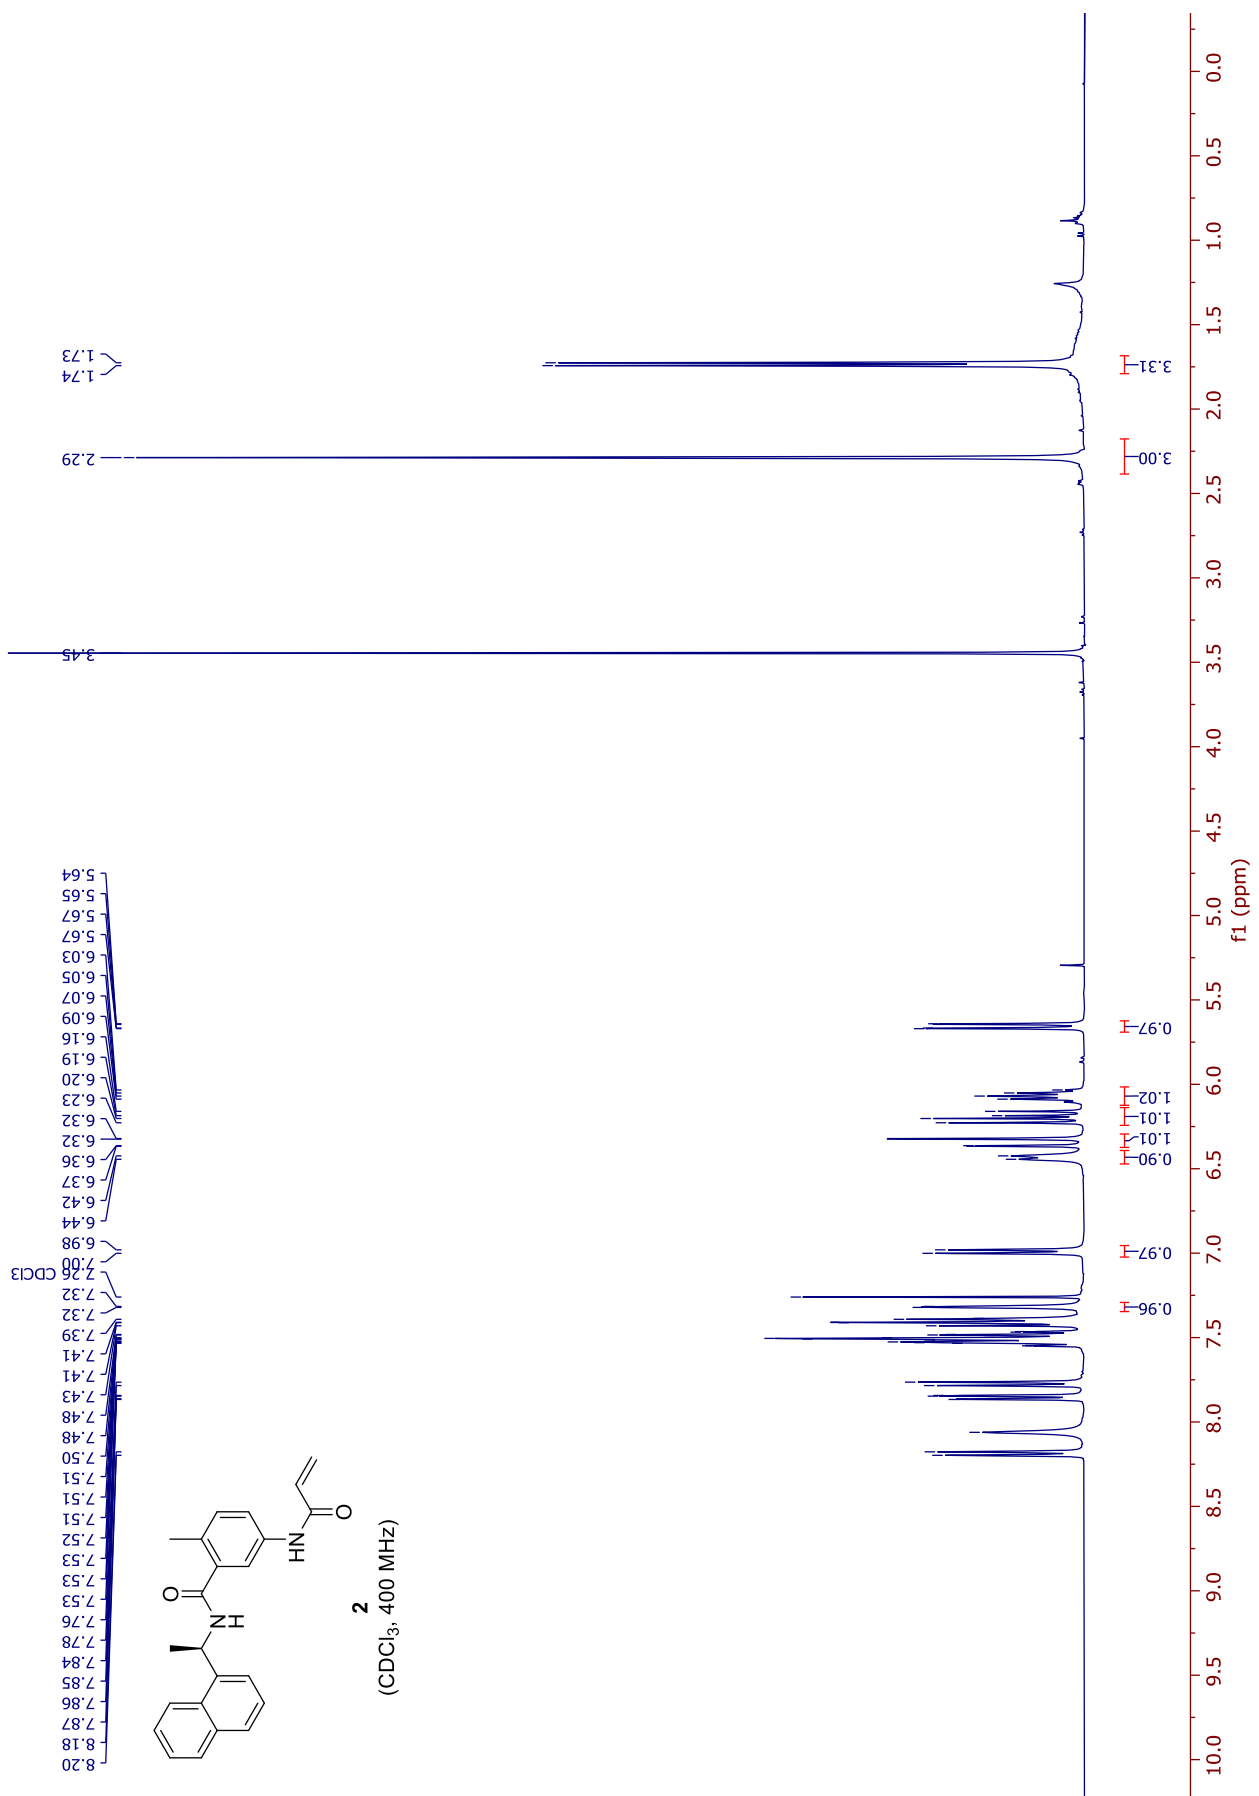

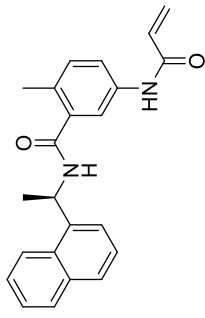

(CDCl<sub>3</sub>, 101 MHz)

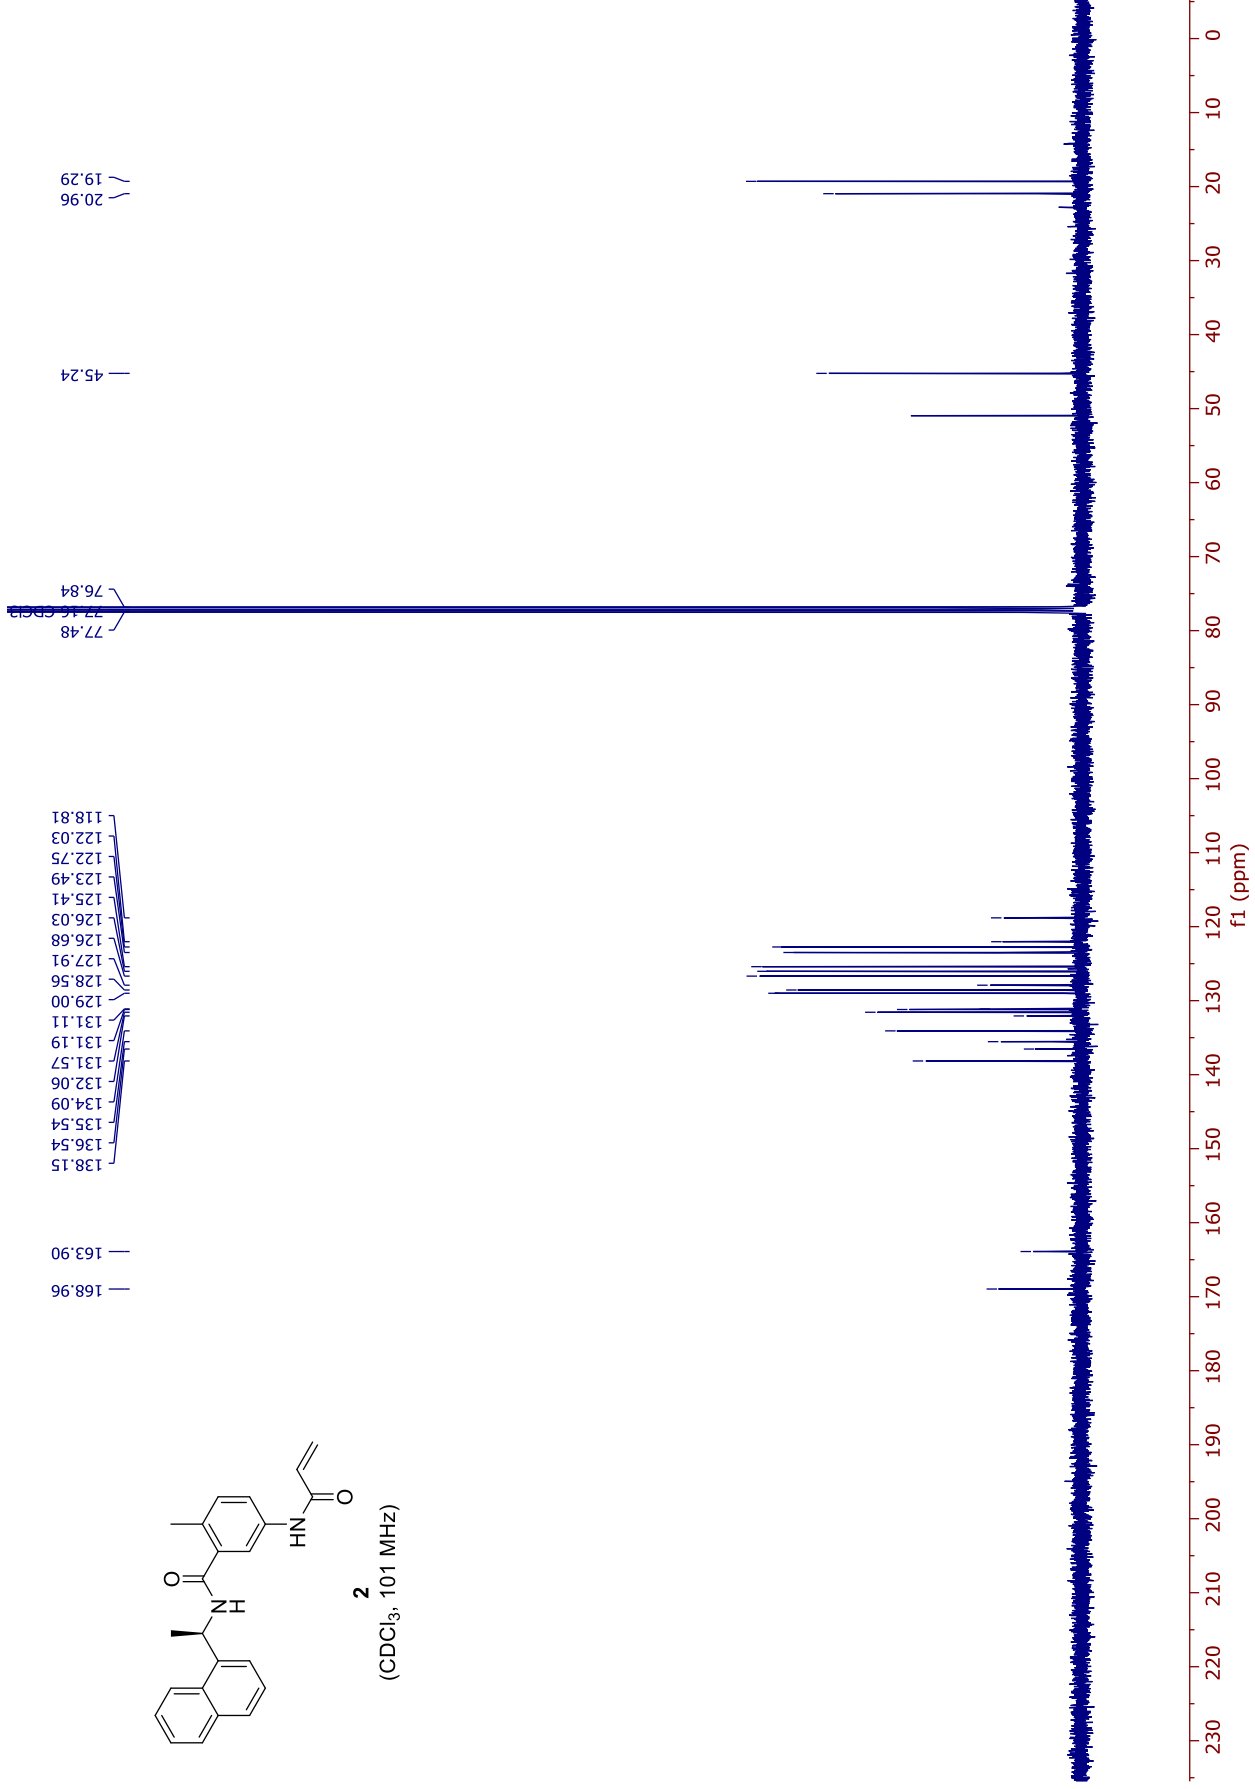

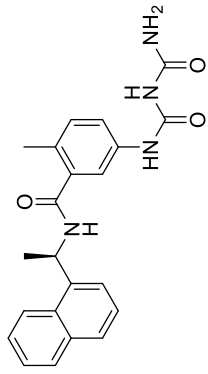

**3**

(DMSO-*d*<sub>6</sub>, 400 MHz)

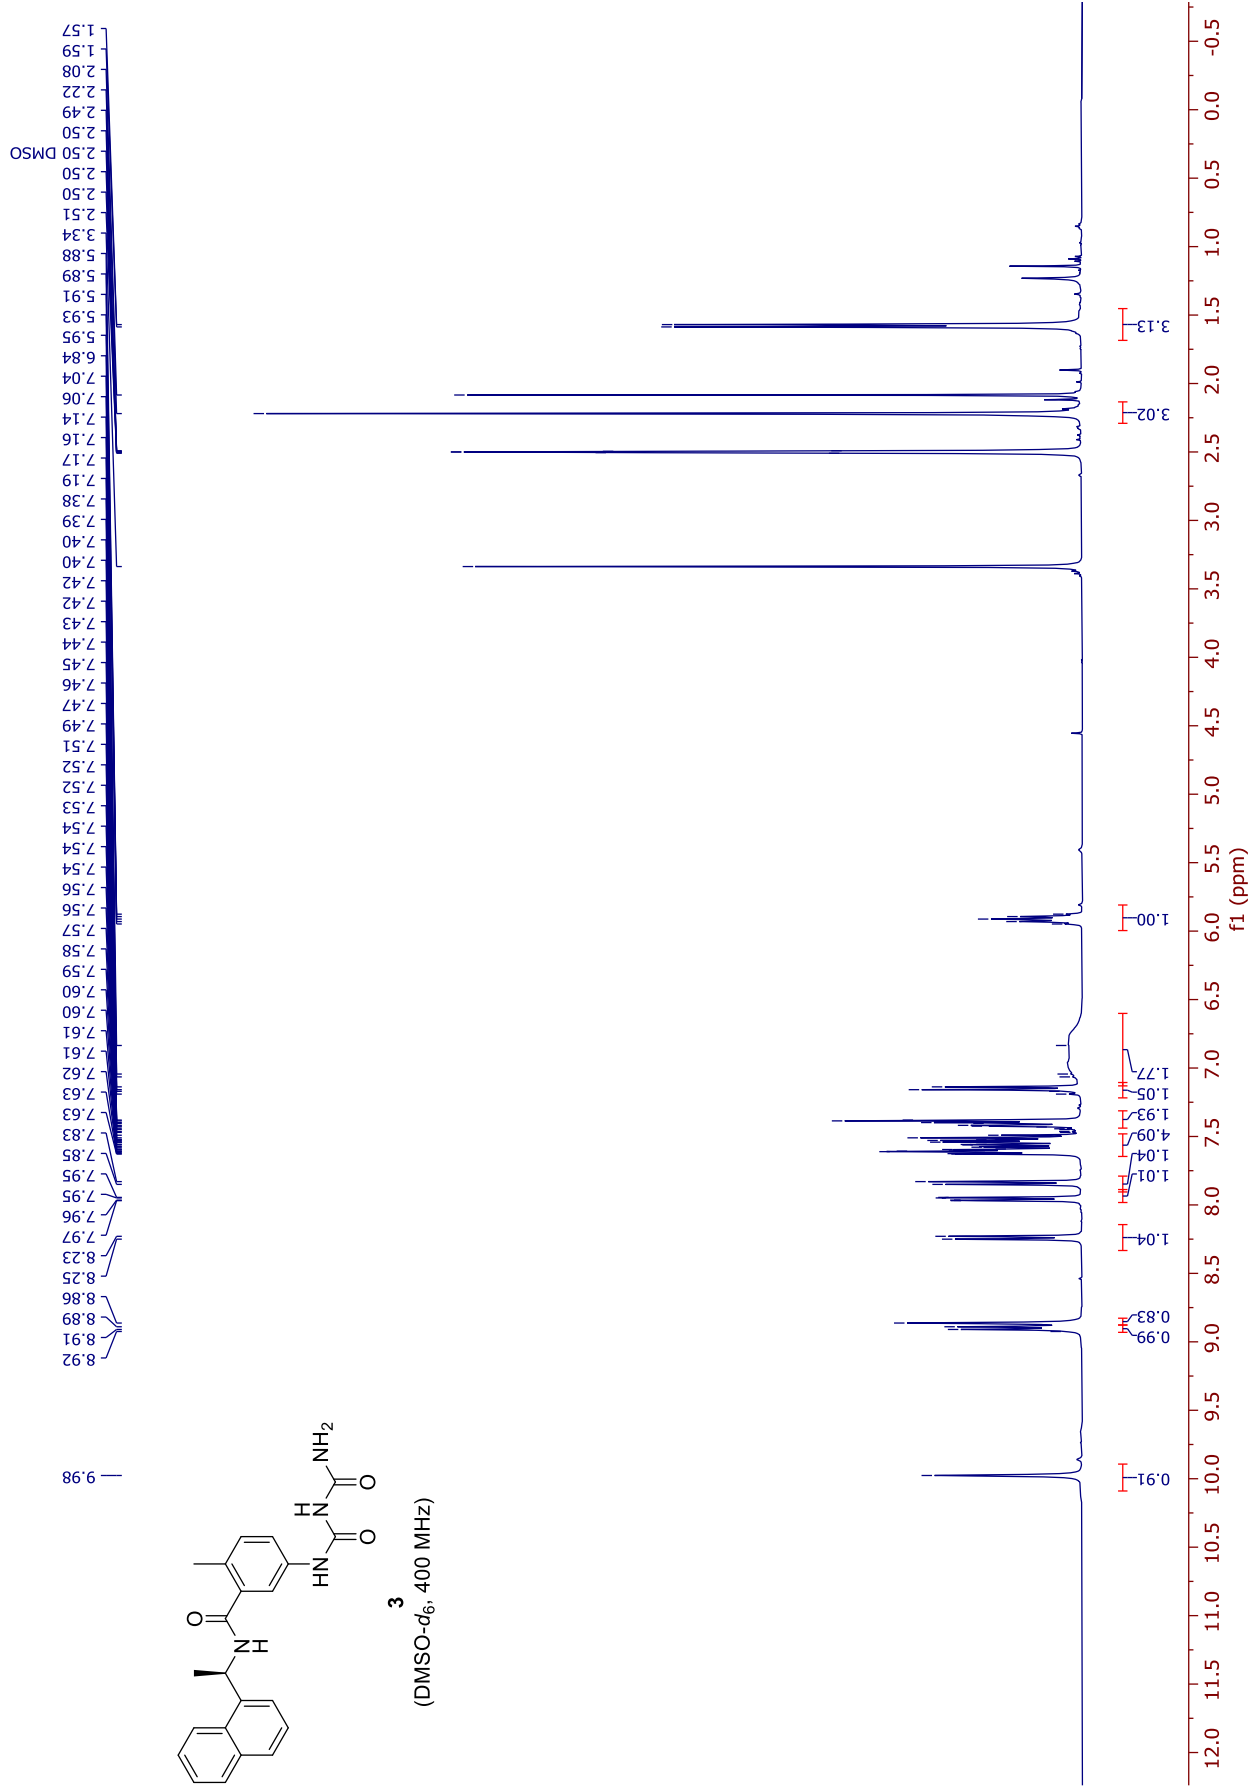

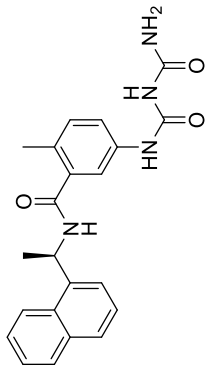

**3**

(DMSO-d<sub>6</sub>, 101 MHz)

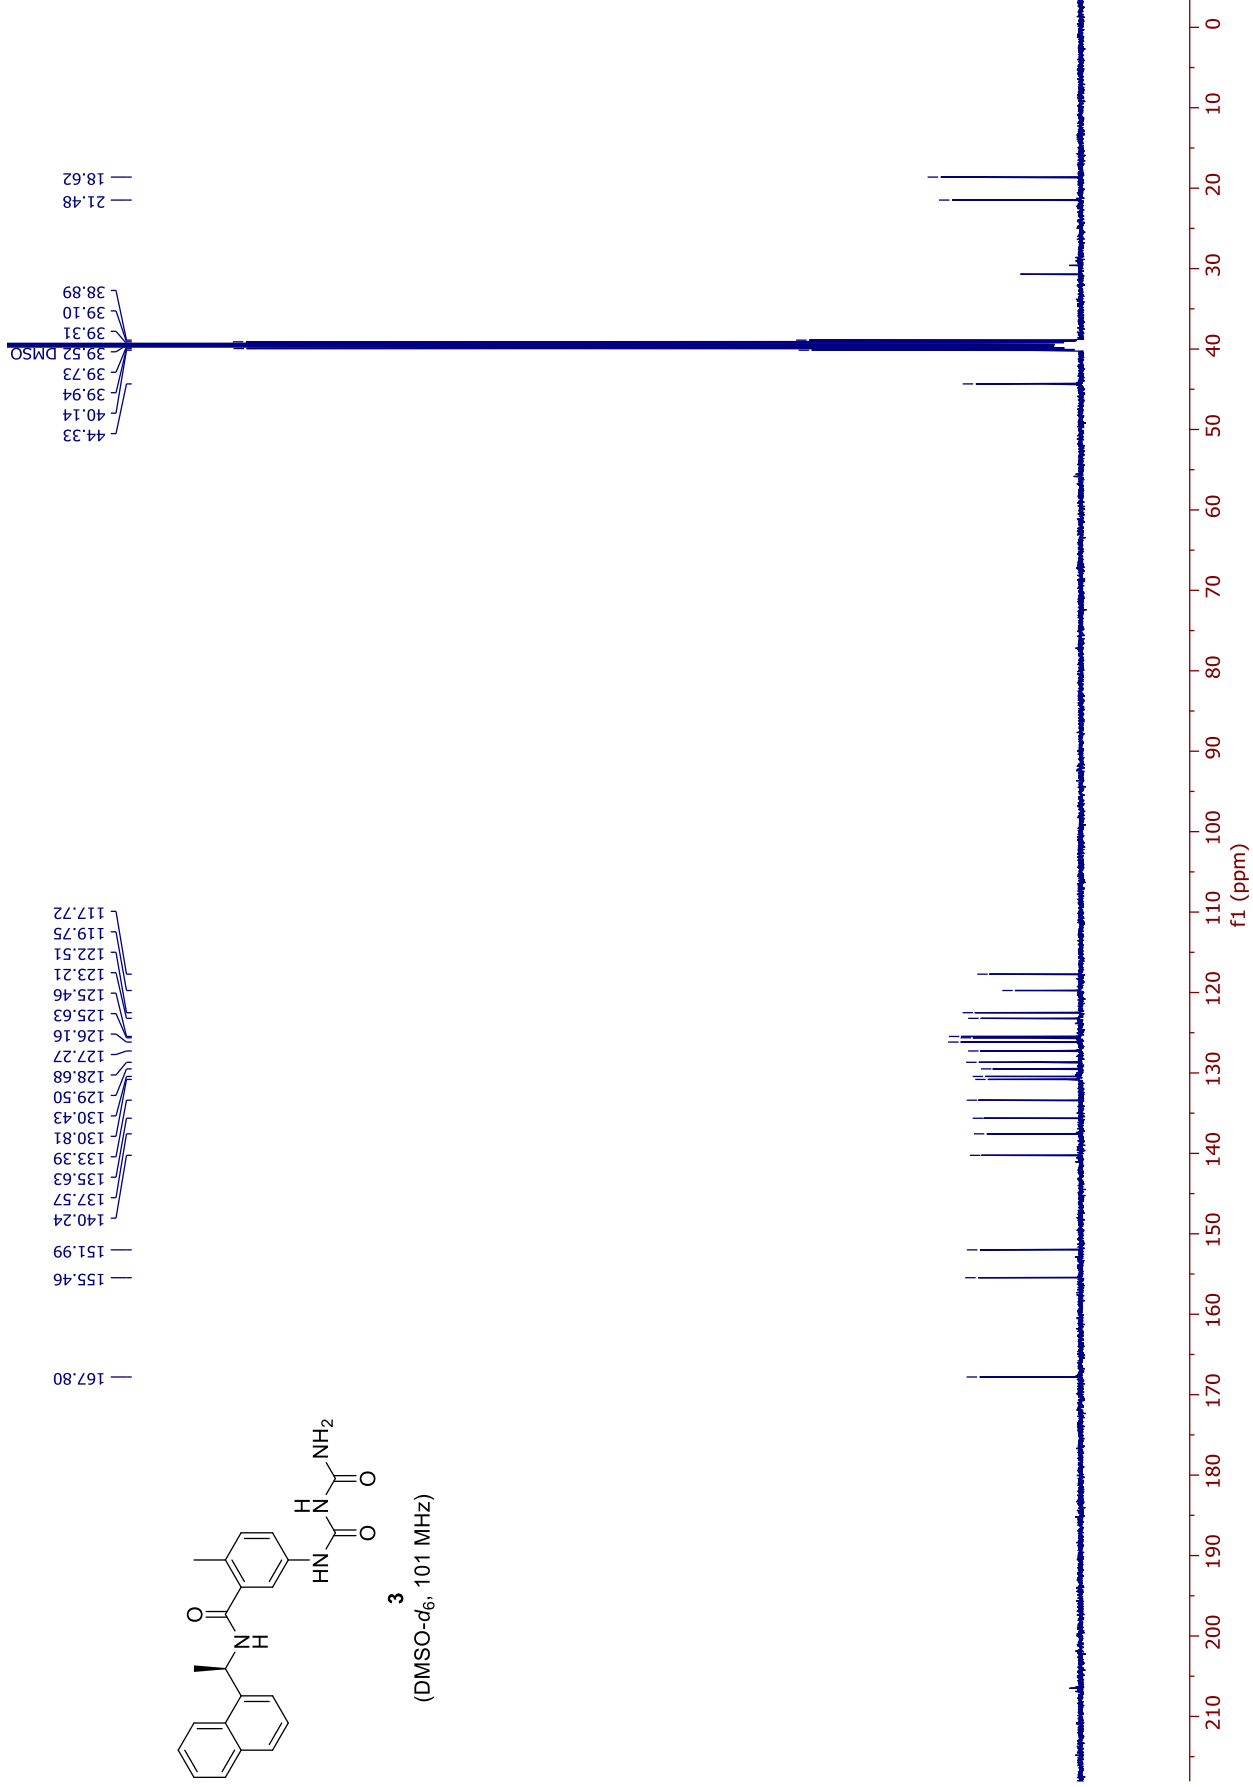

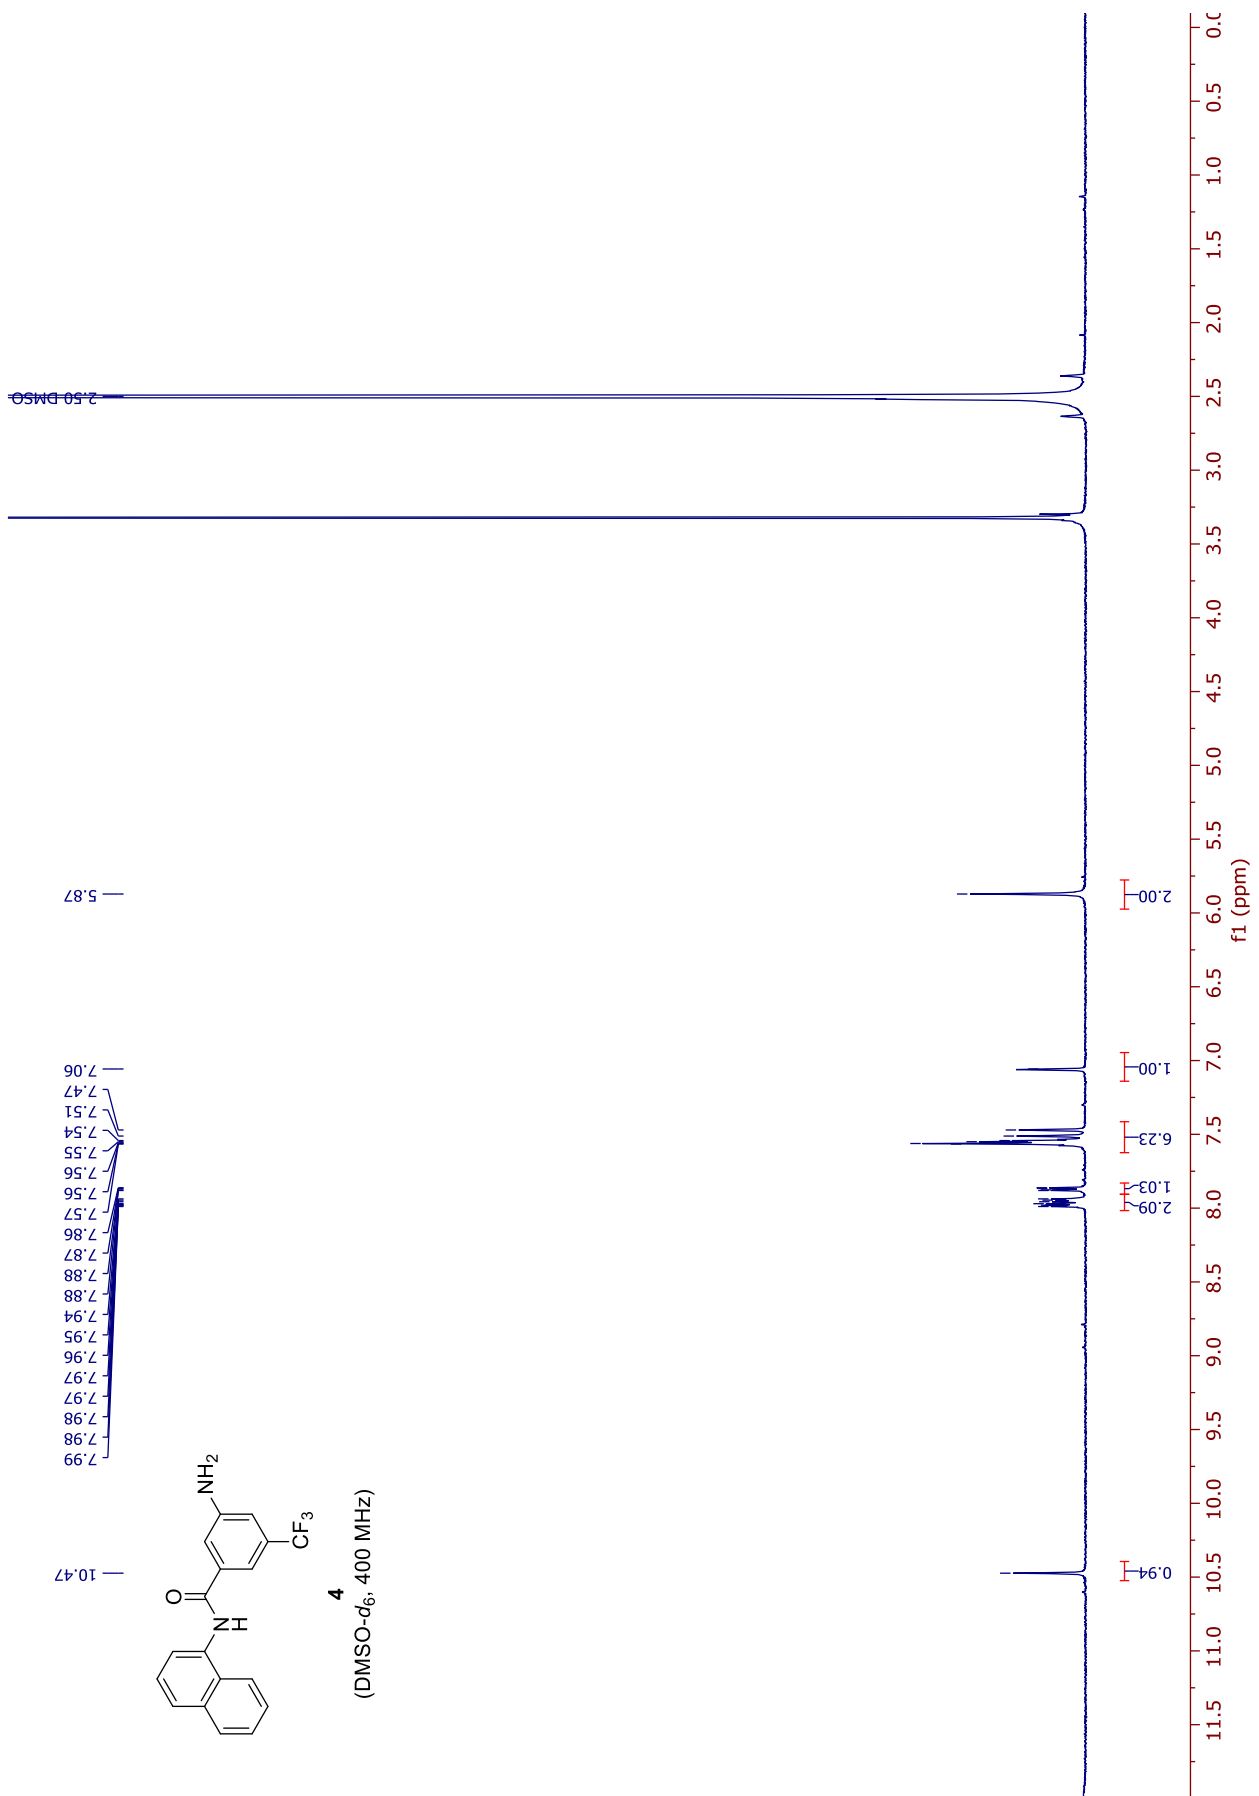

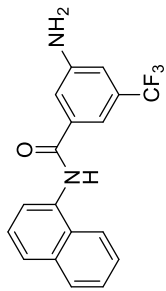

**4**  
(DMSO- $d_6$ , 101 MHz)

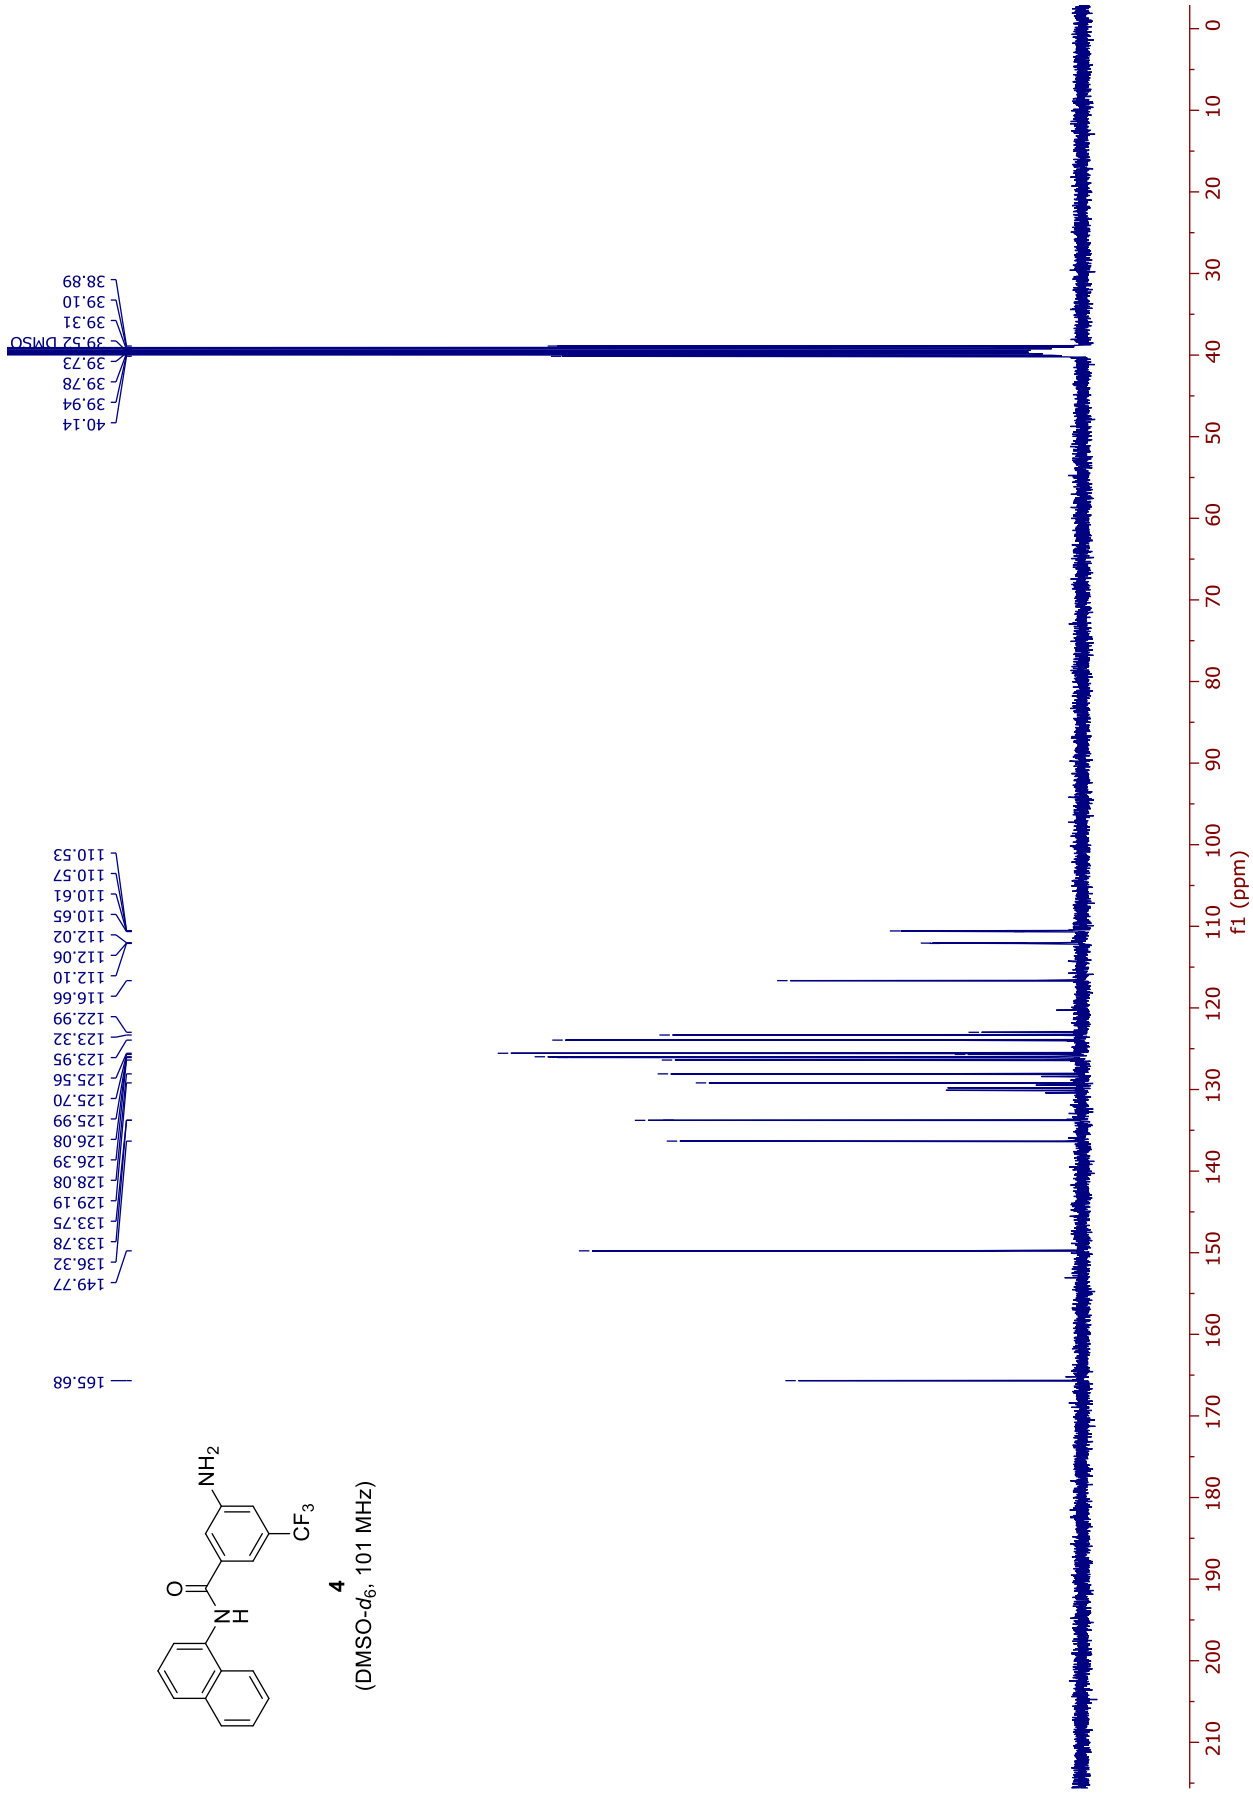



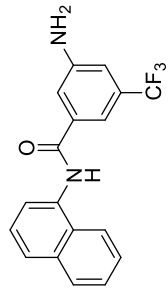

**4**

(DMSO- $d_6$ , 470 MHz)

— -61.34

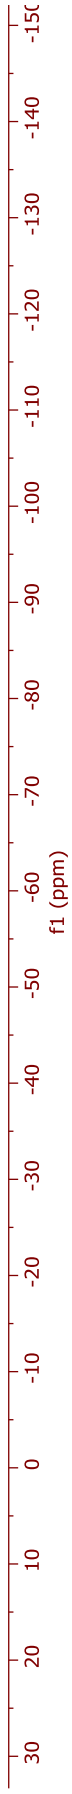

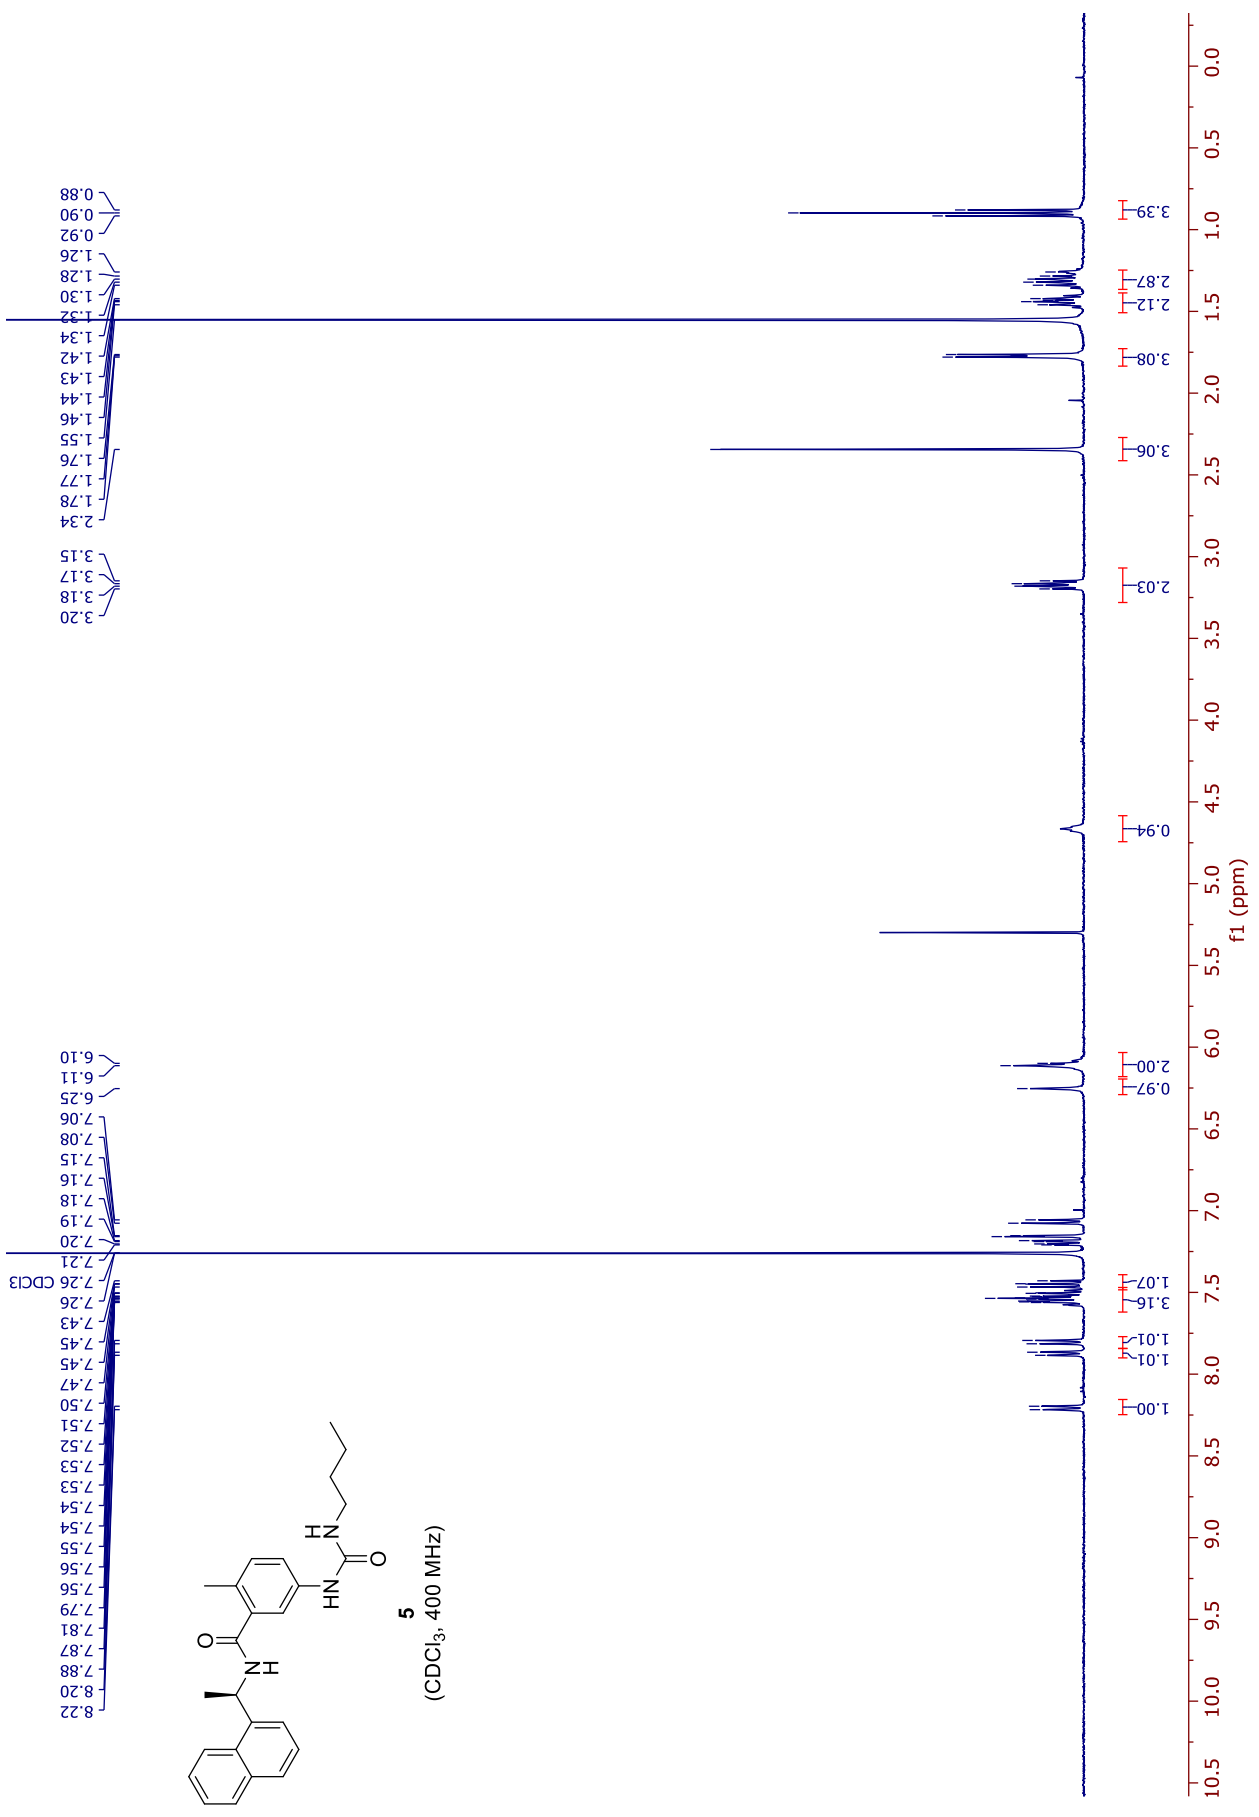

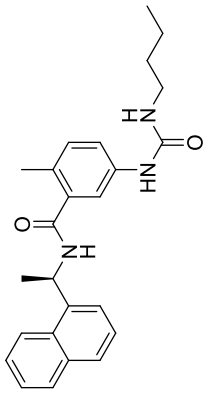

5

(DMSO-d<sub>6</sub>, 126 MHz)

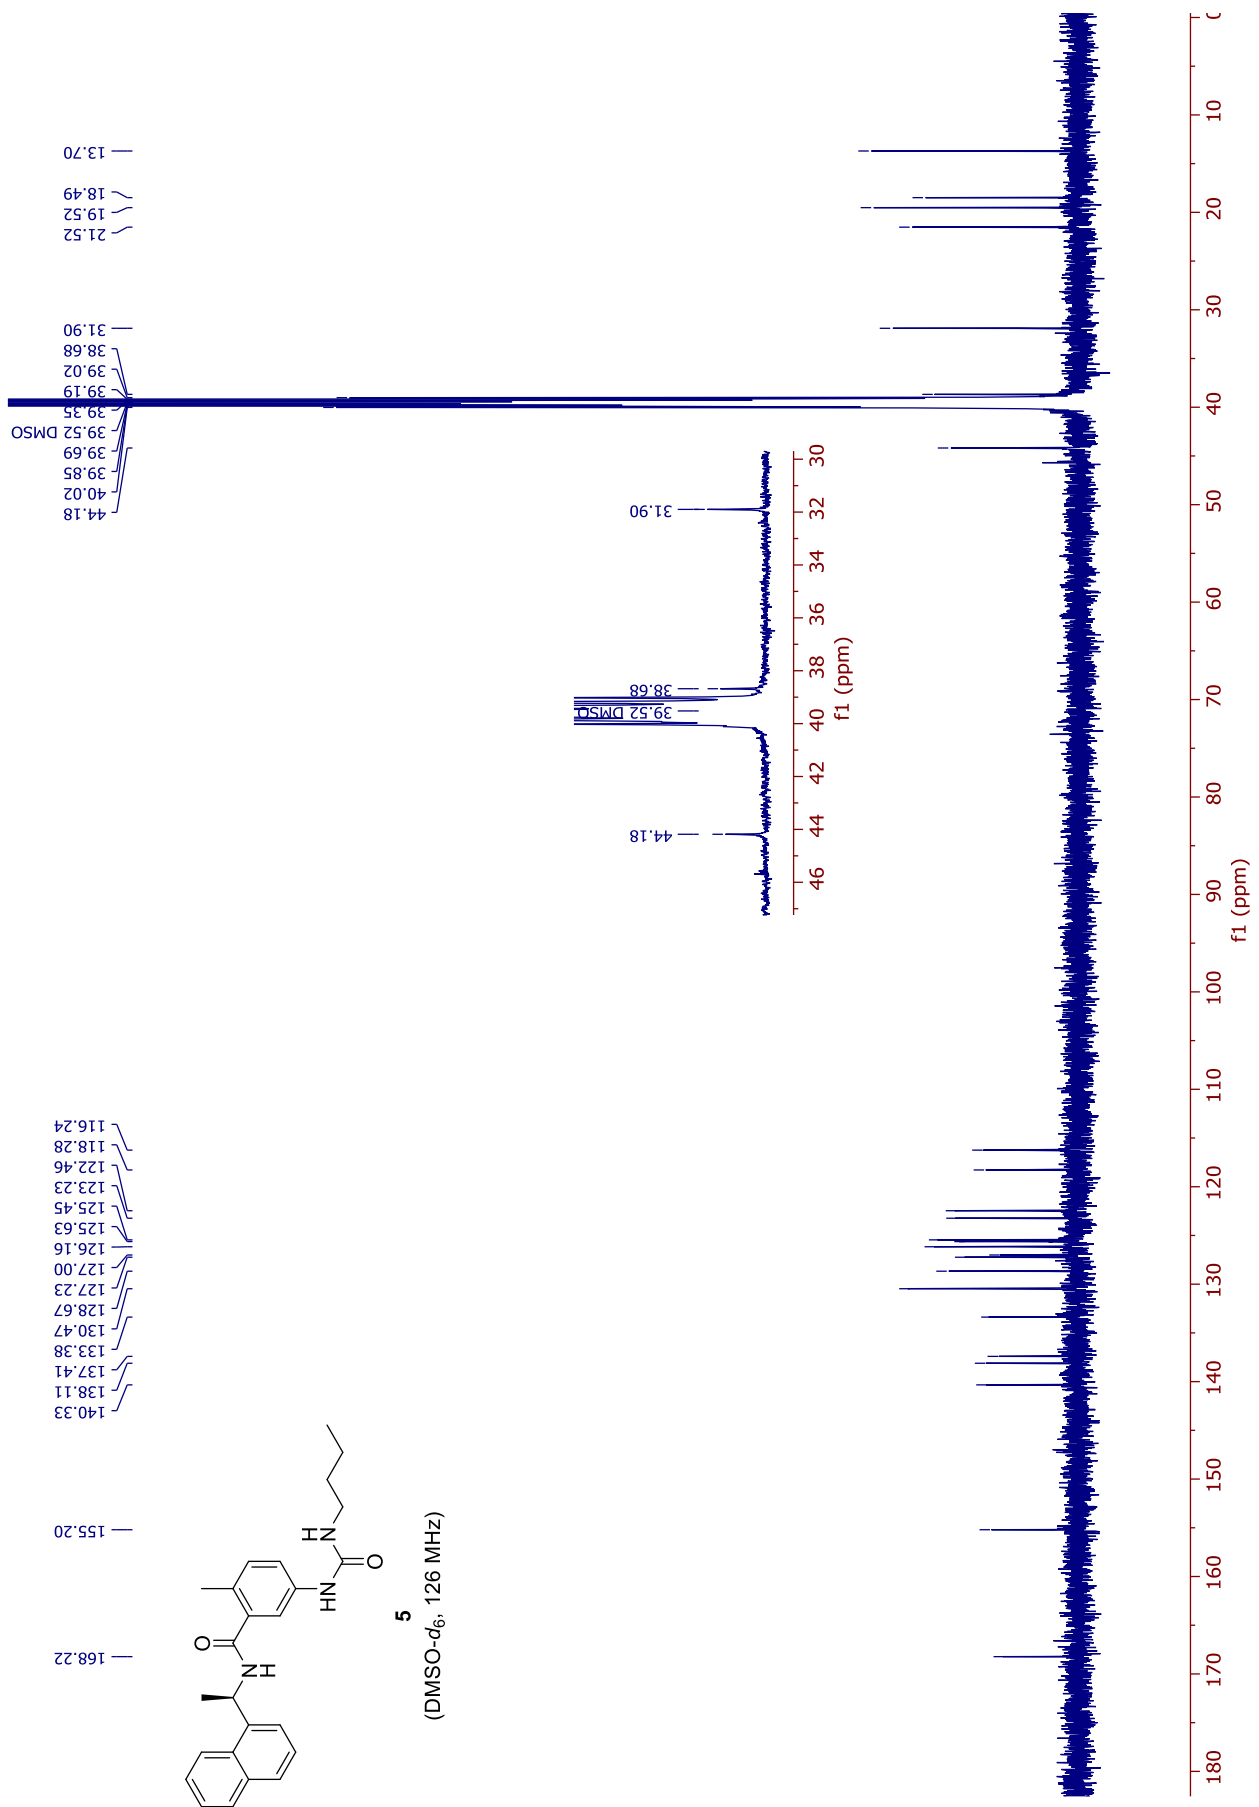

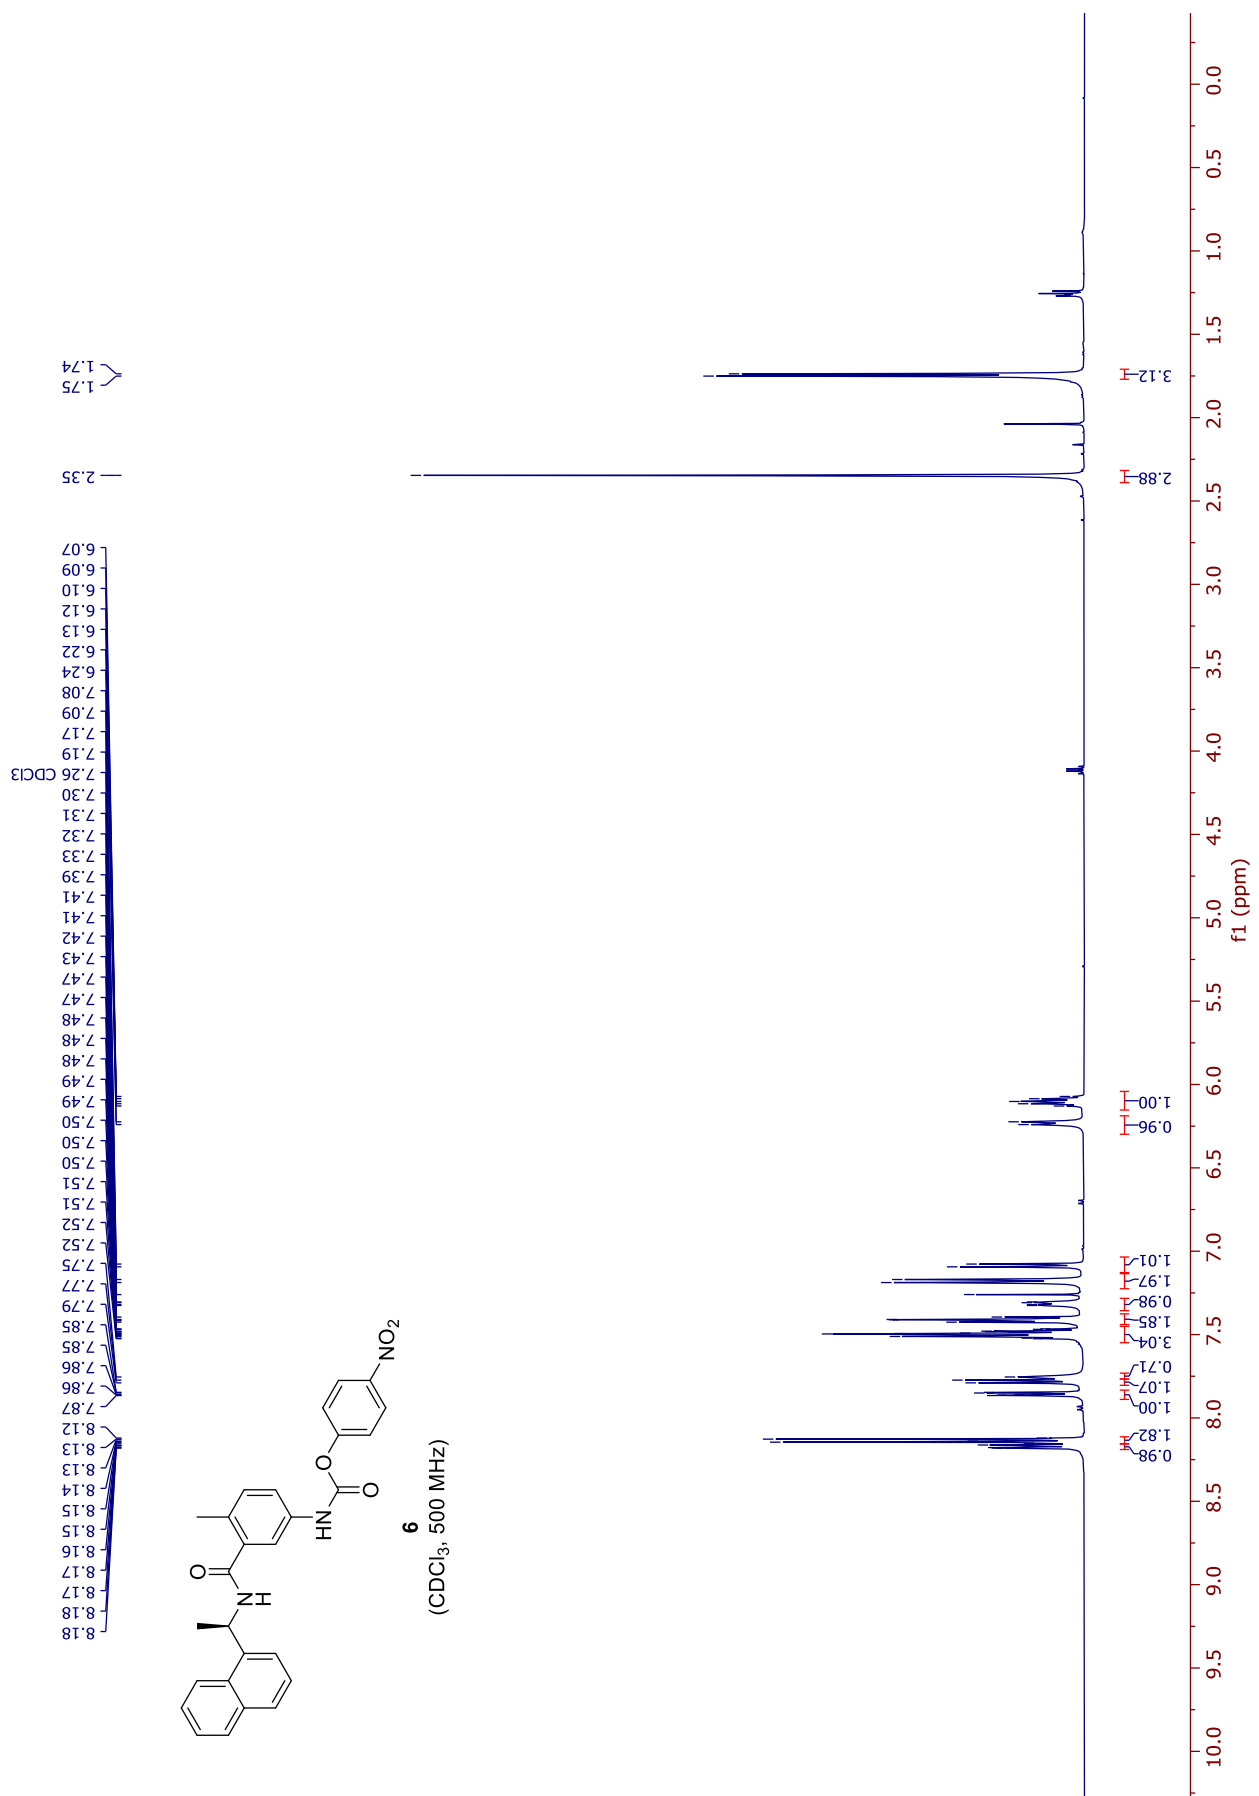

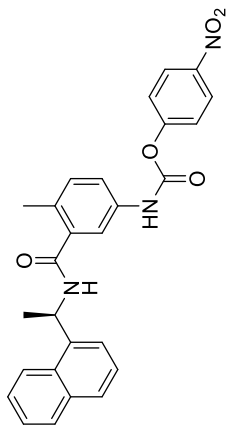

(CDCl<sub>3</sub>, 126 MHz)

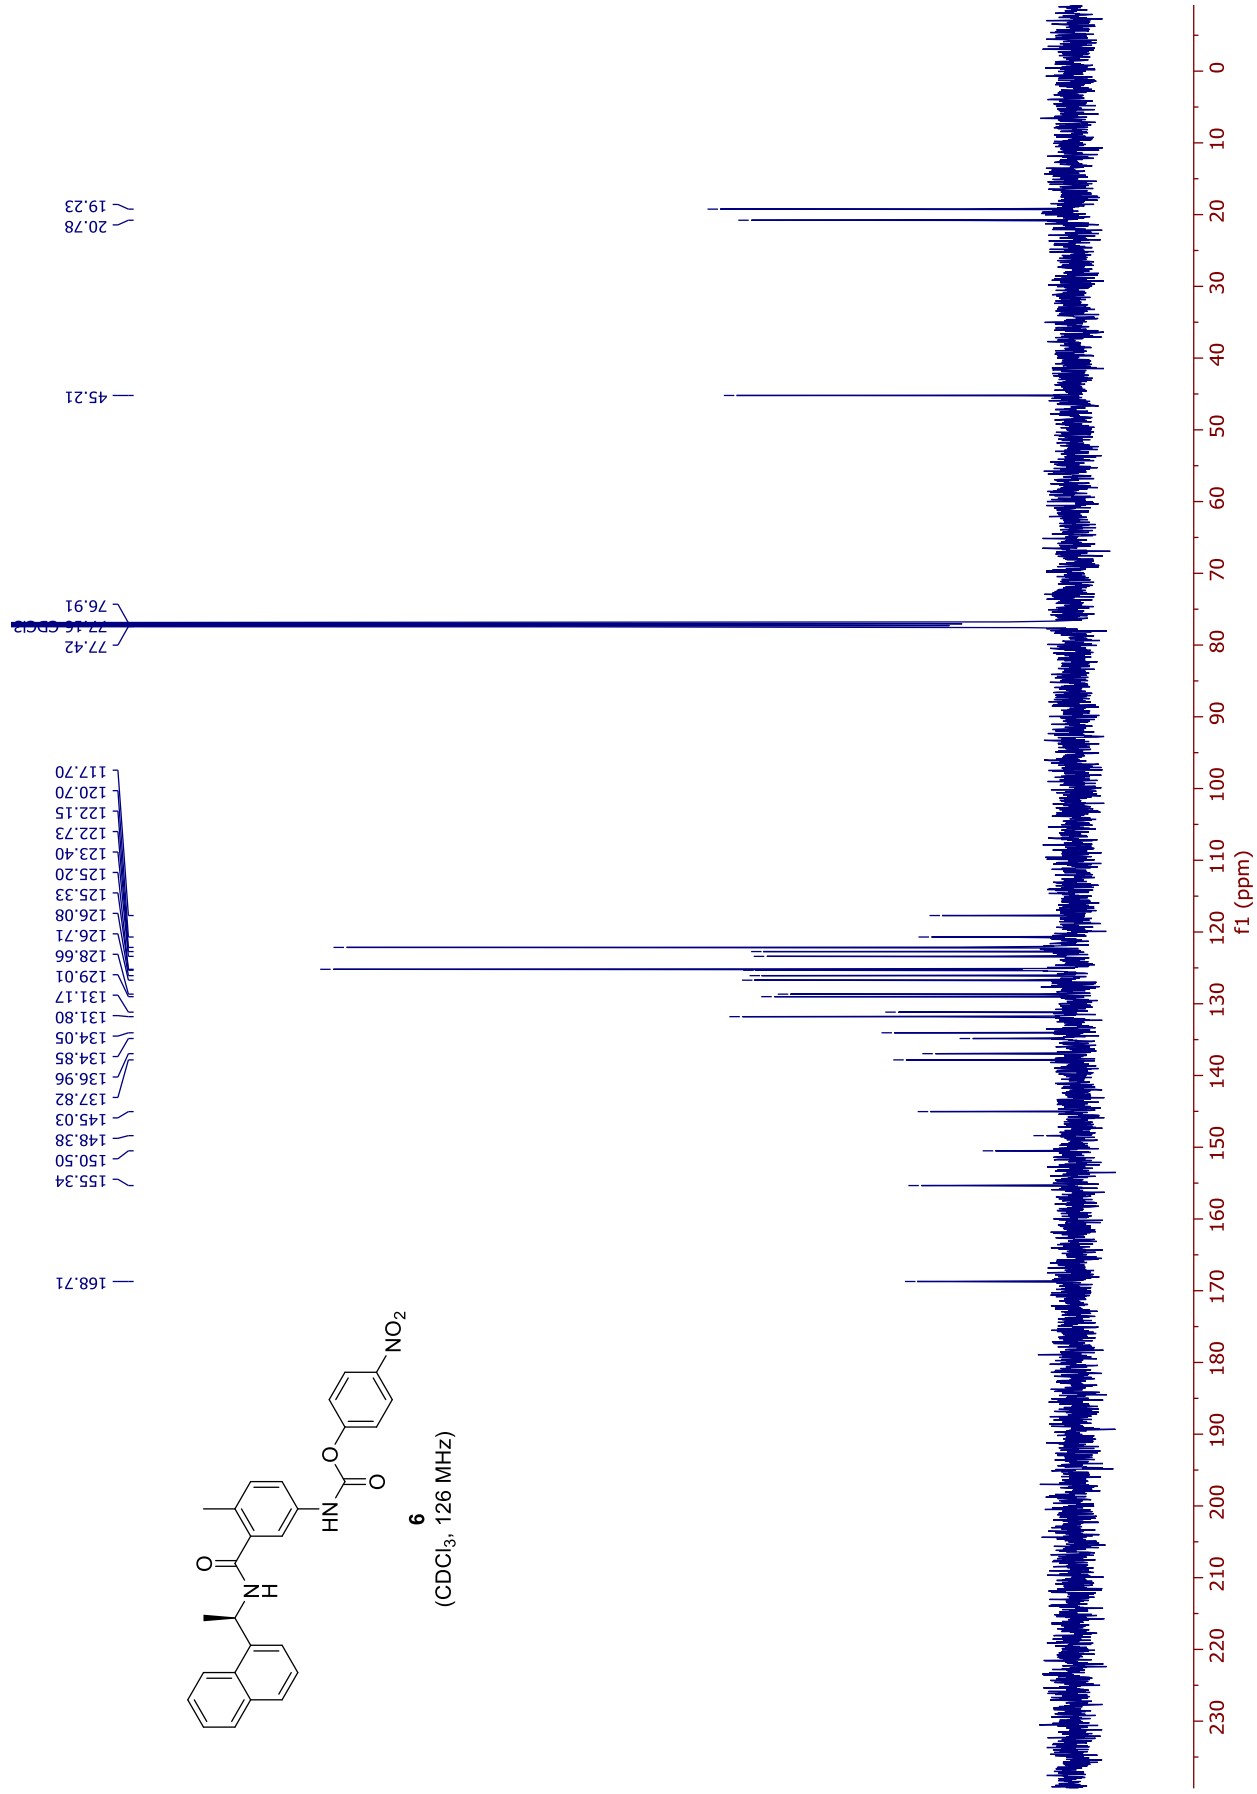

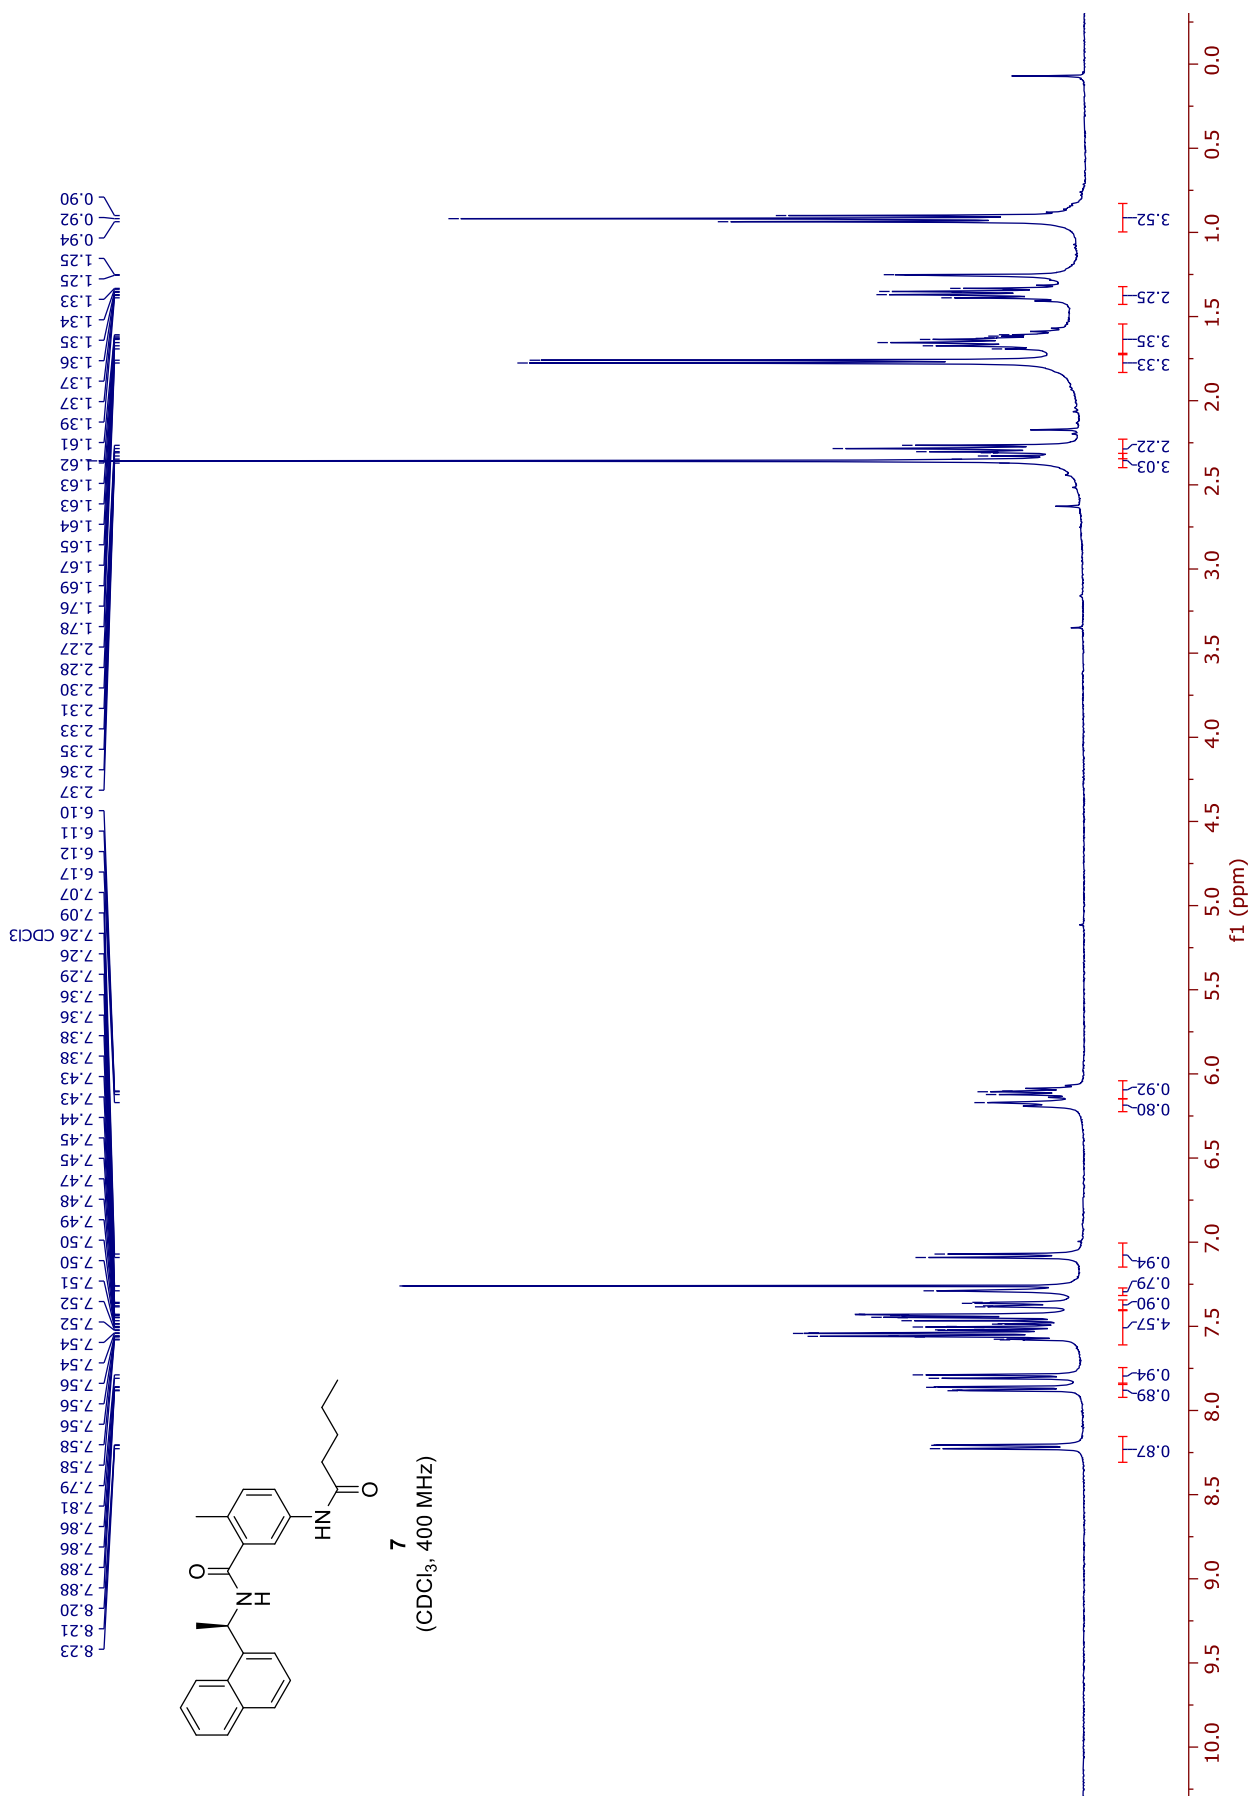

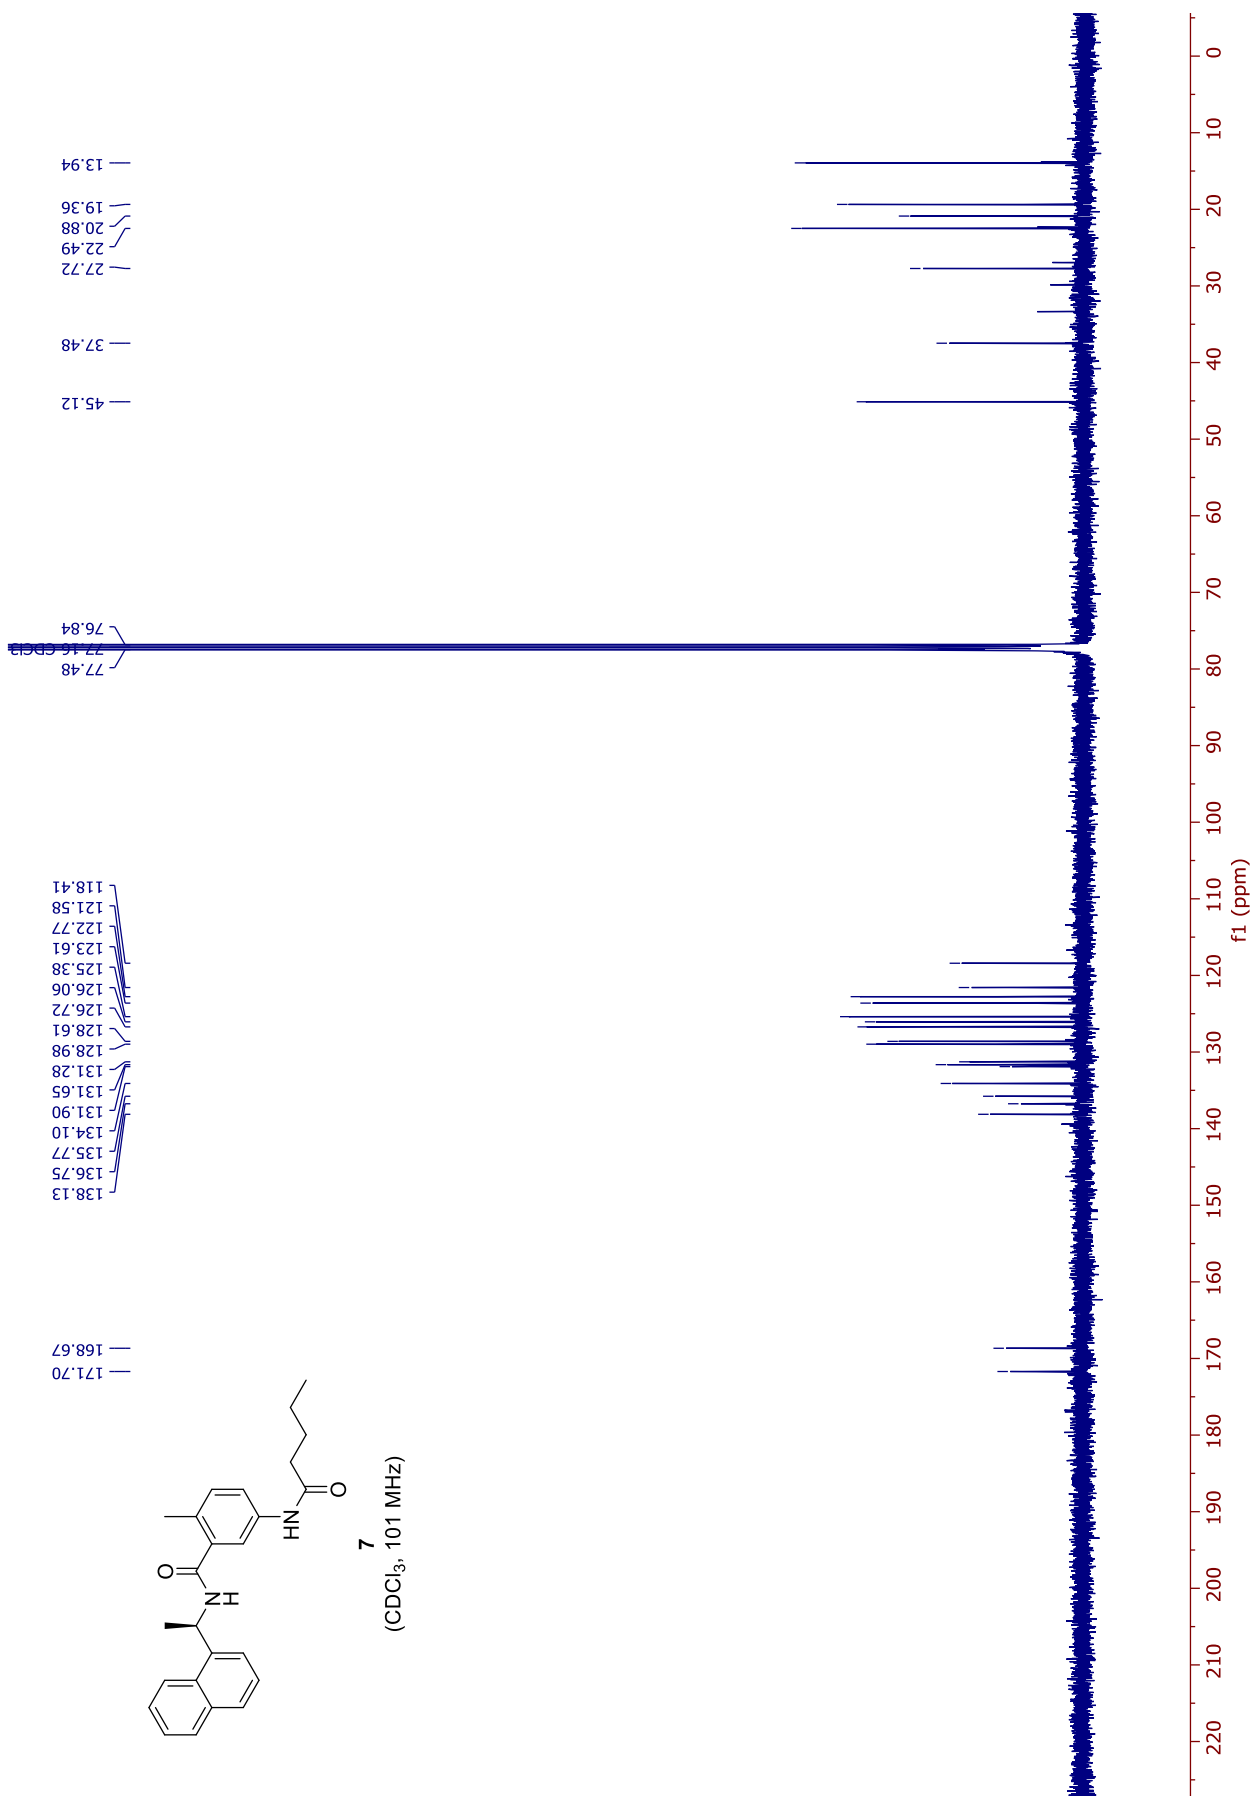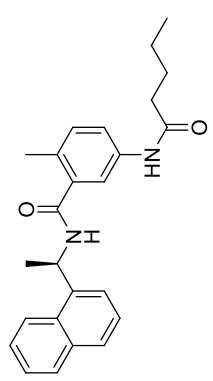

7  
(CDCl<sub>3</sub>, 101 MHz)

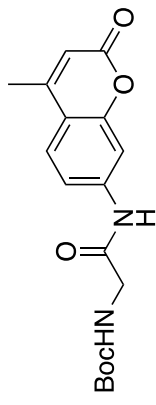

**S1**  
<sup>1</sup>H NMR, (CD<sub>3</sub>)<sub>2</sub>SO, 400 MHz)

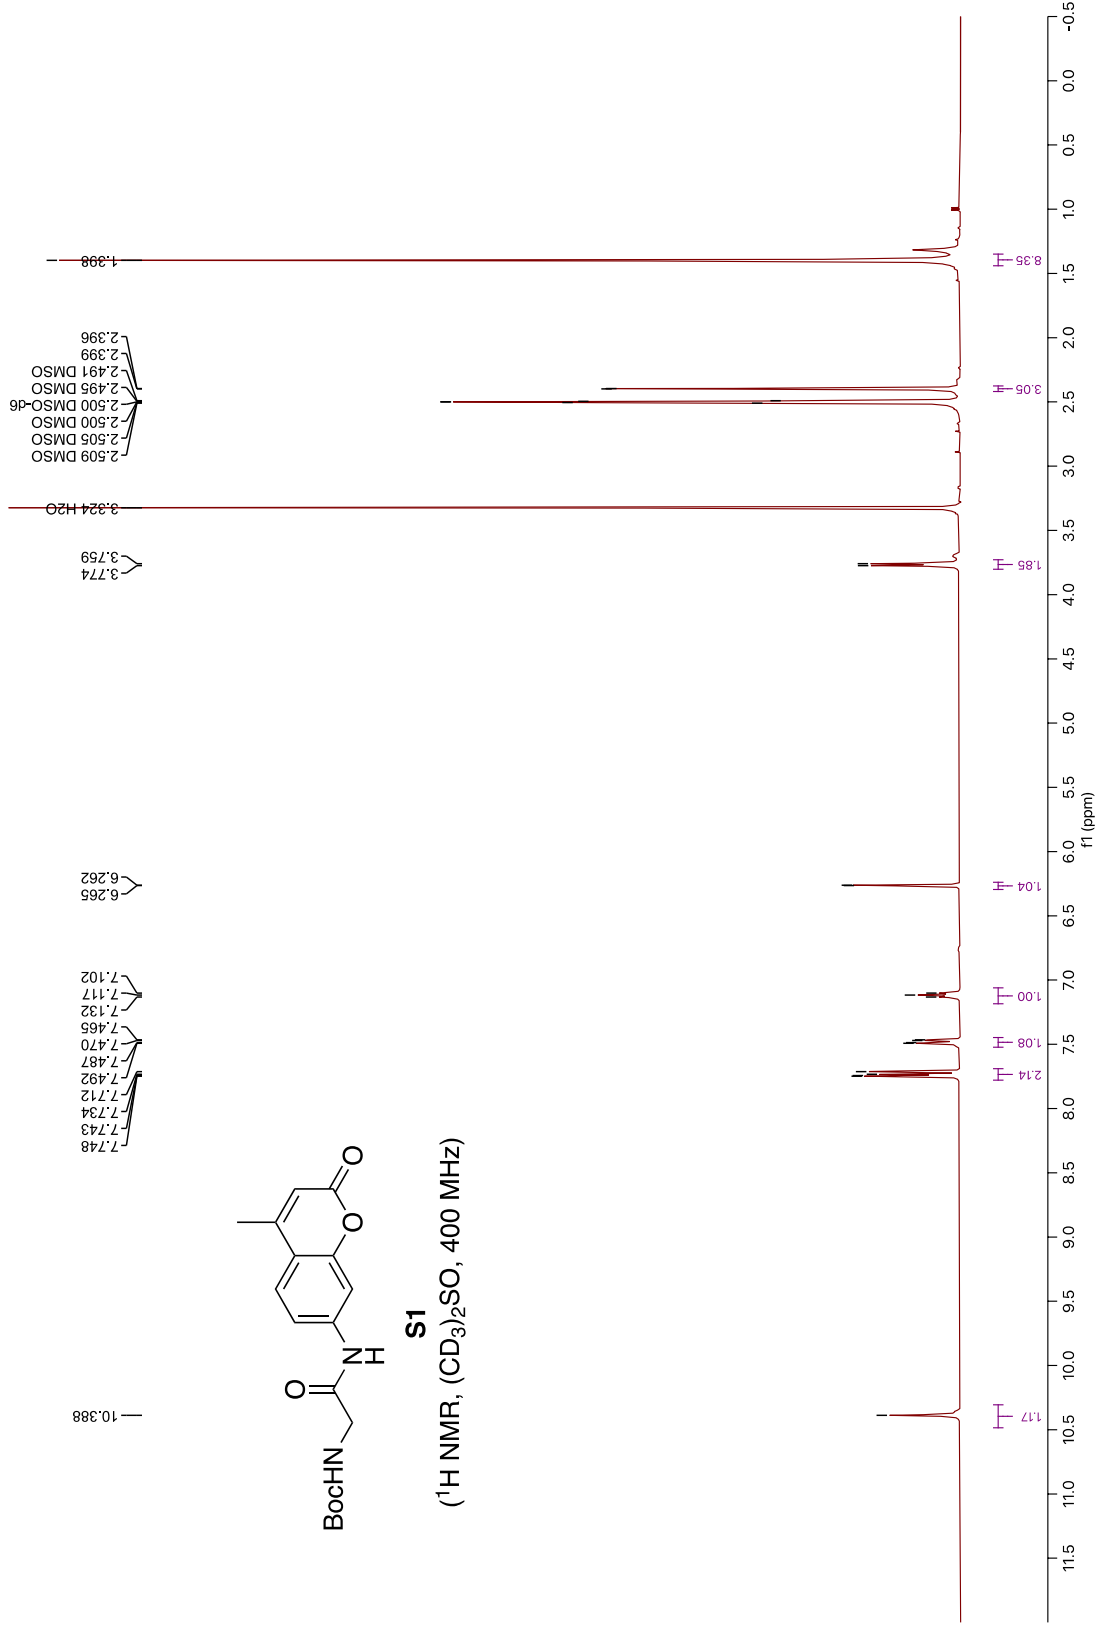



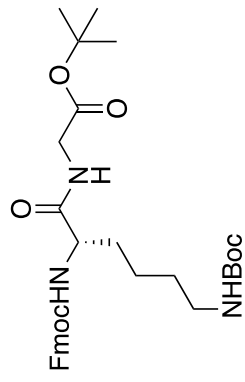

**S2**  
 (<sup>1</sup>H NMR, CDCl<sub>3</sub>, 400 MHz)

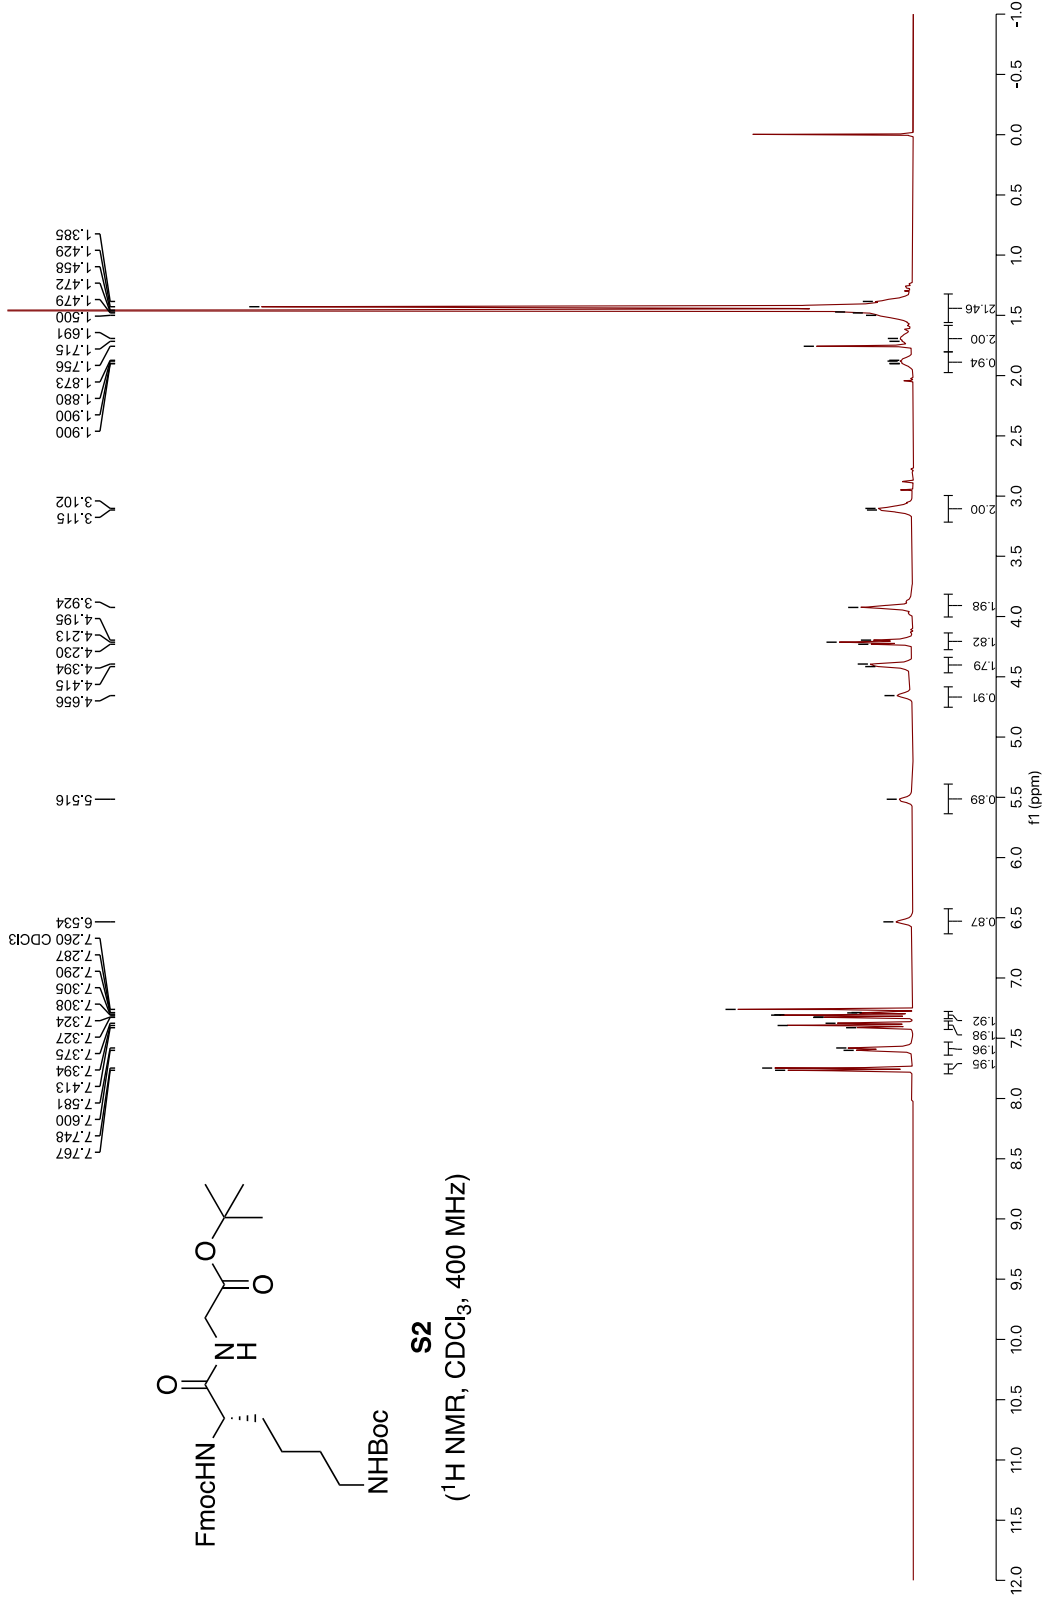

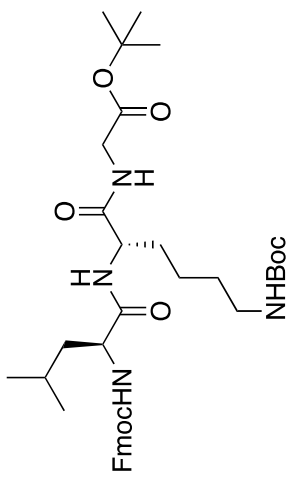

**S3**  
 (<sup>1</sup>H NMR, CDCl<sub>3</sub>, 400 MHz)

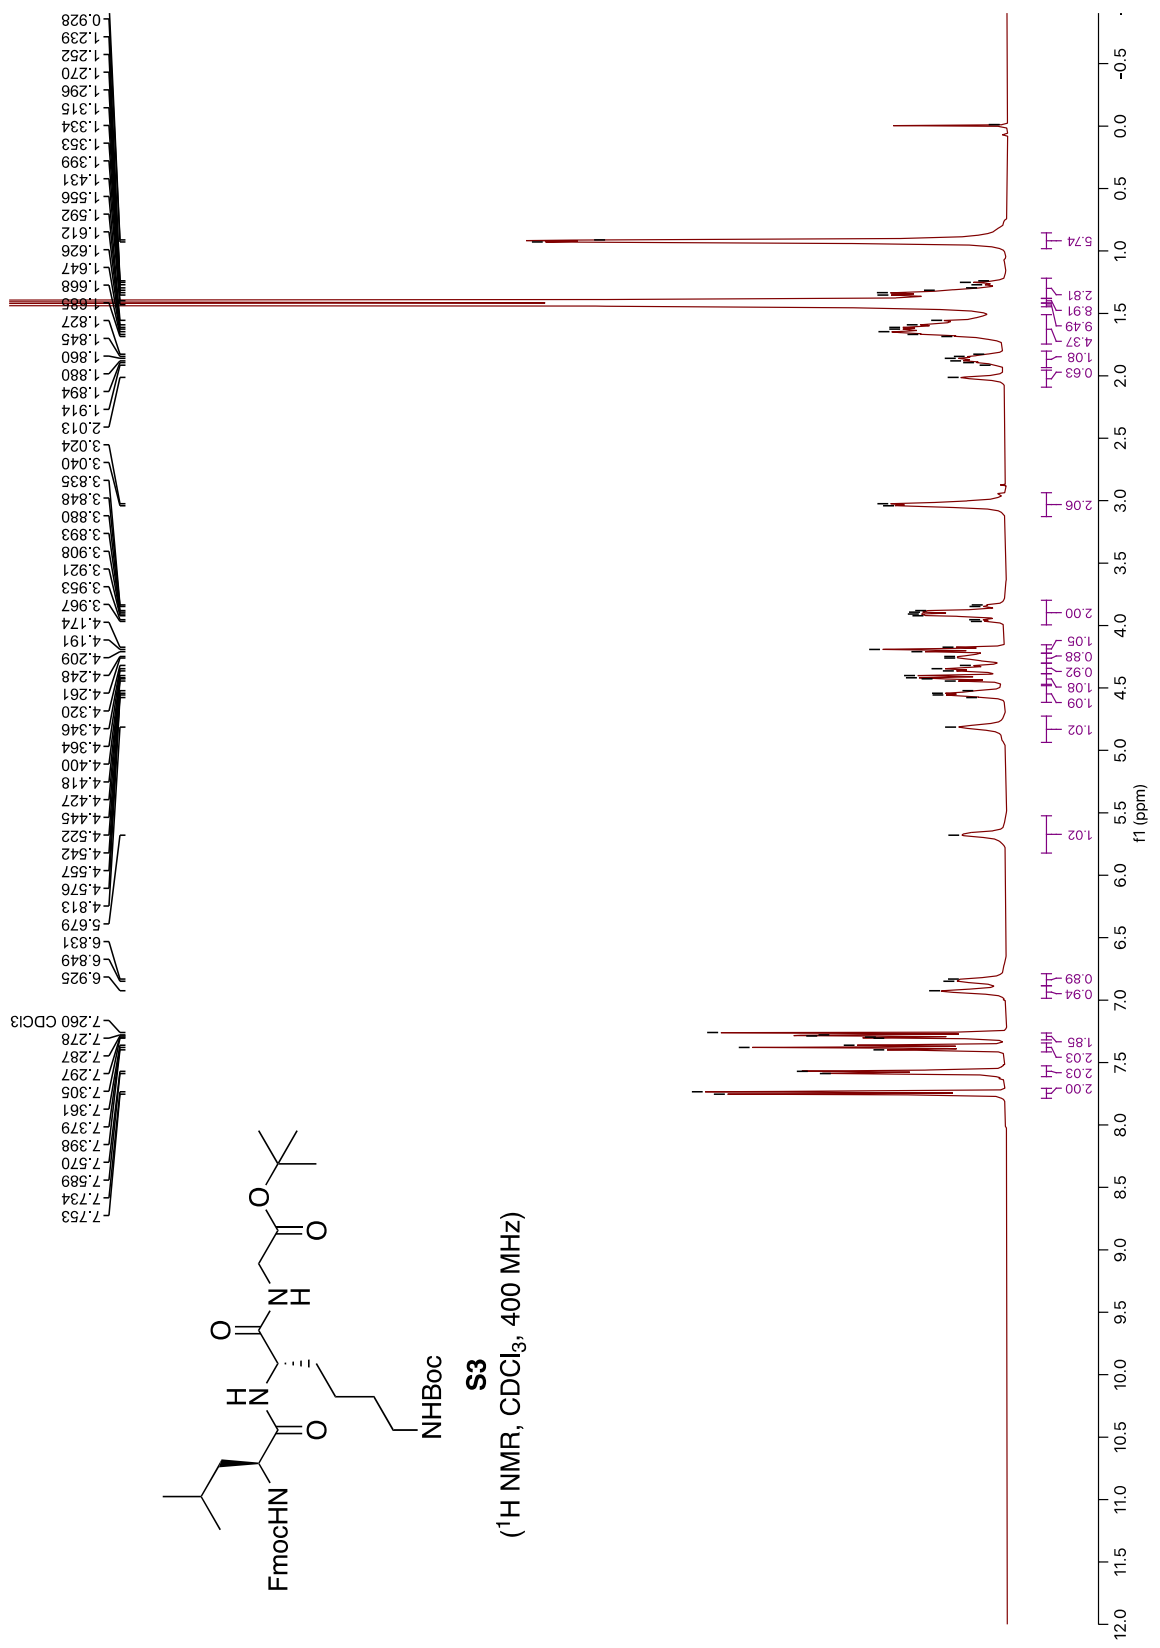

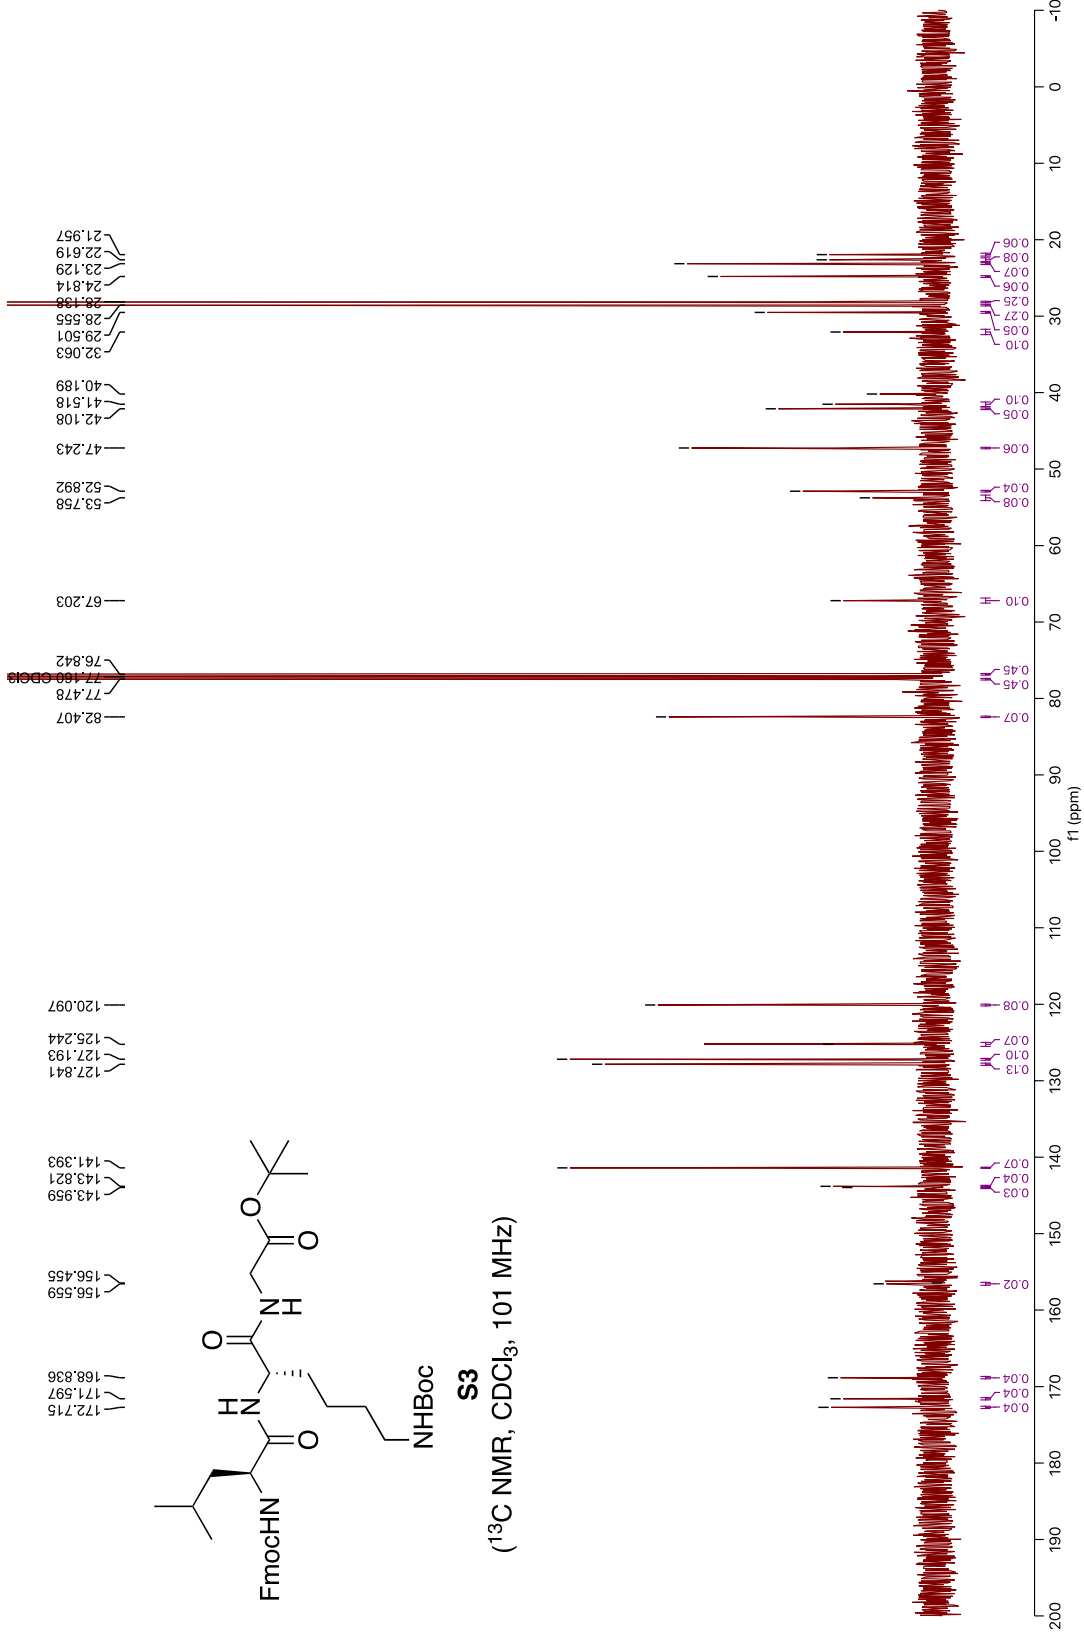

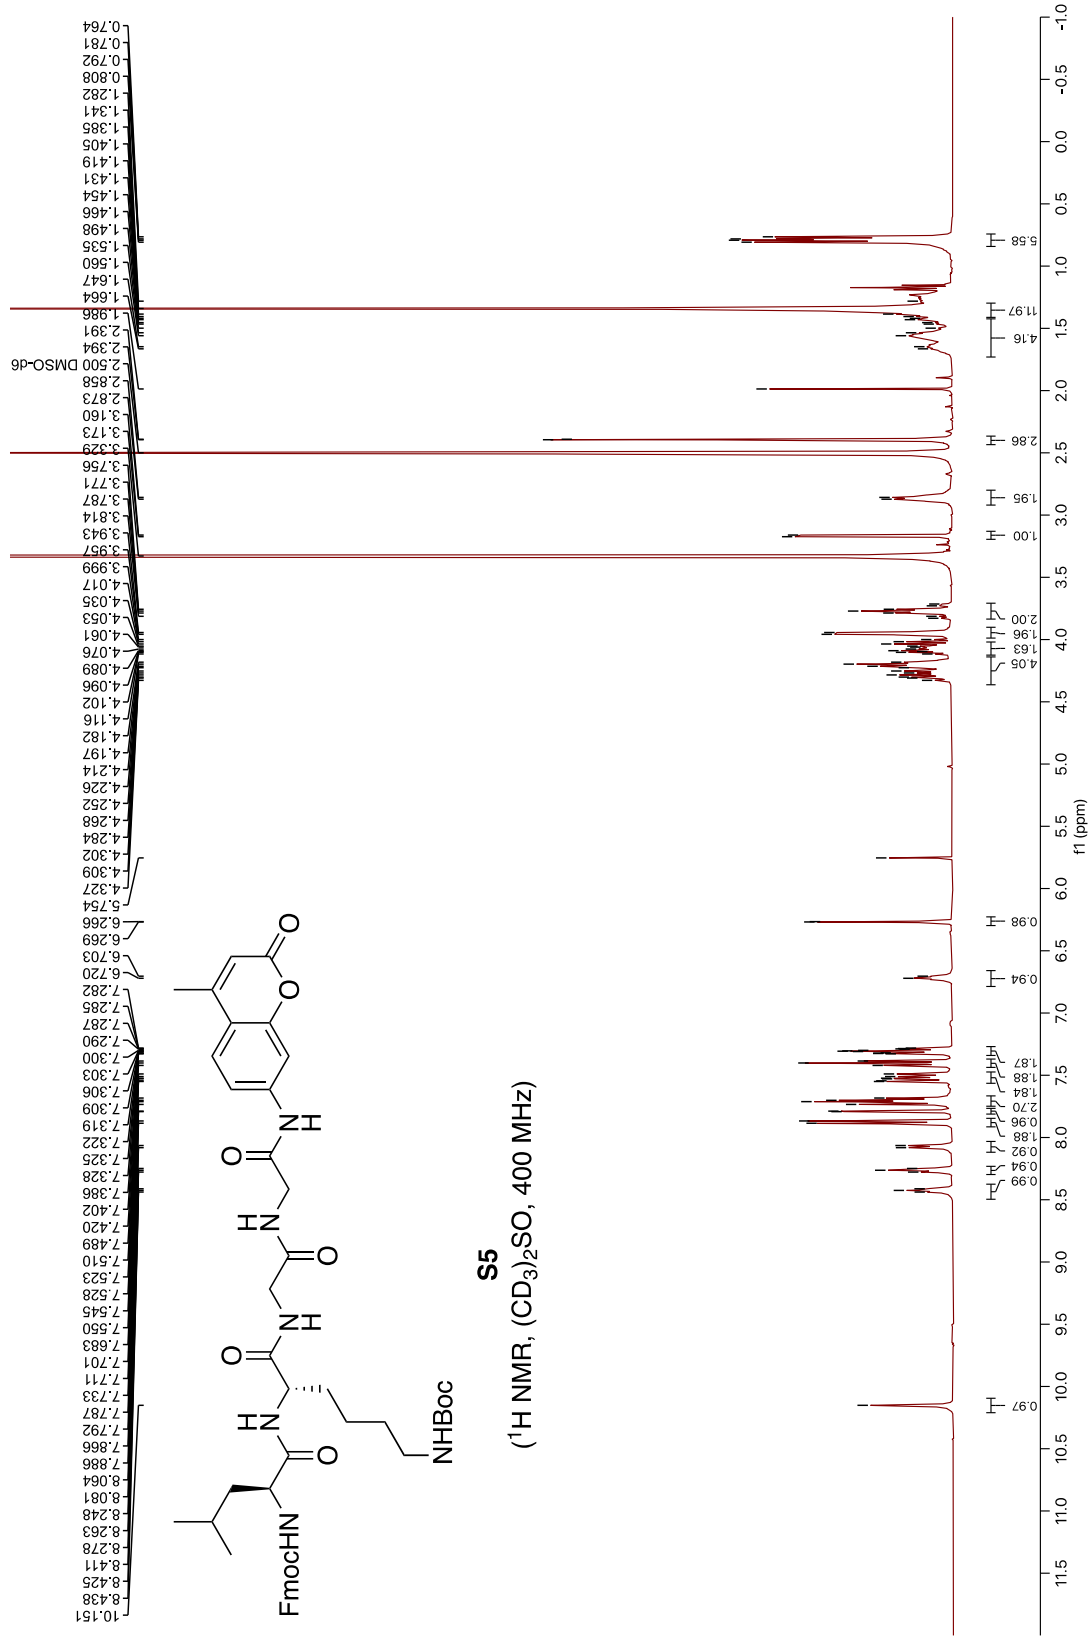

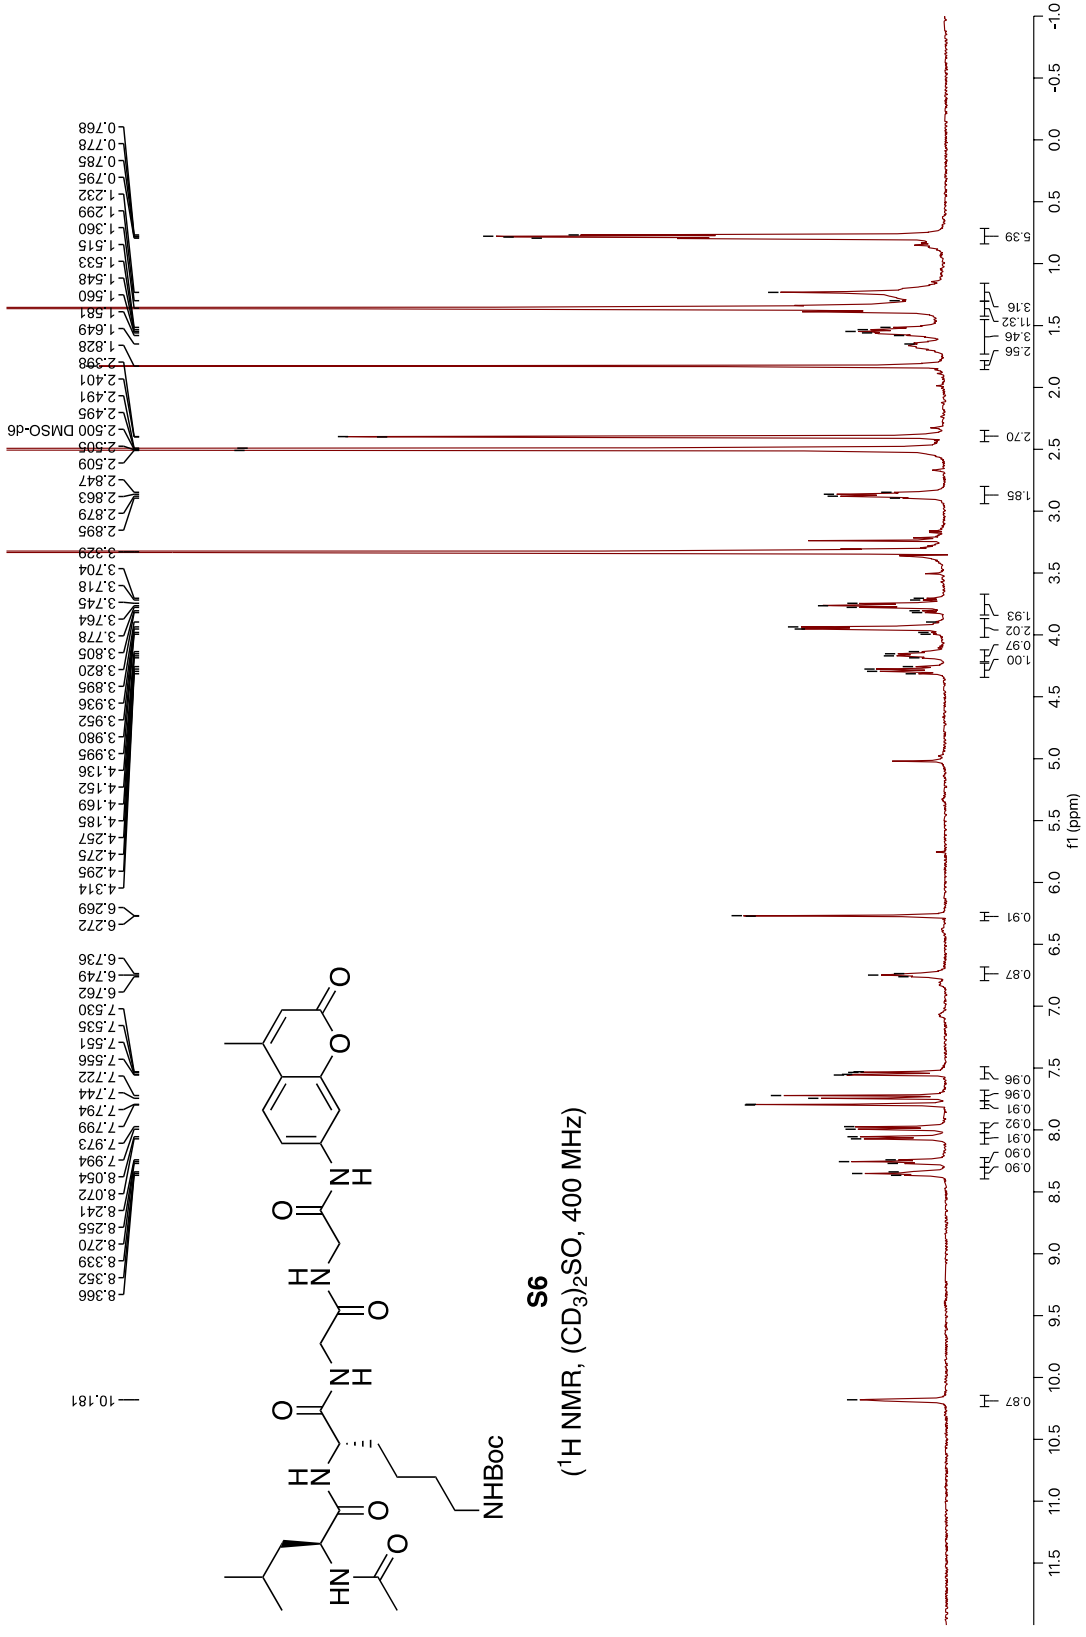

Supplement: 41467_2021_21060_MOESM4_ESM.pdf [file 41467_2021_21060_MOESM4_ESM.pdf]
