# Supplementary material for: Structure of papain-like protease from SARS-CoV-2 and its complexes with non-covalent inhibitors
Source: Springer Nature journal article supplement (doi:10.1038/s41467-021-21060-3), 2021-02-02
Supplement: 41467_2021_21060_MOESM3_ESM.pdf [file 41467_2021_21060_MOESM3_ESM.pdf]

## Description of Additional Supplementary Files

**Supplementary Data 1:** NMR spectra of compounds synthesized for studies conducted on SARS-CoV-2 PLpro.
